# Supplementary material for: Antithrombotic management of patients with acute coronary syndrome and atrial fibrillation undergoing coronary stenting: a prospective, observational, nationwide study
Source: PubMed Central journal article supplement — BMJ Open. 2020 Dec 22;10(12):e041044. doi: 10.1136/bmjopen-2020-041044 (PMC7757435; doi:10.1136/bmjopen-2020-041044), 2020-12-22
Supplement: bmjopen-2020-041044.draft_revisions.pdf [file bmjopen-2020-041044.draft_revisions.pdf]

# BMJ Open

BMJ Open is committed to open peer review. As part of this commitment we make the peer review history of every article we publish publicly available.

When an article is published we post the peer reviewers' comments and the authors' responses online. We also post the versions of the paper that were used during peer review. These are the versions that the peer review comments apply to.

The versions of the paper that follow are the versions that were submitted during the peer review process. They are not the versions of record or the final published versions. They should not be cited or distributed as the published version of this manuscript.

BMJ Open is an open access journal and the full, final, typeset and author-corrected version of record of the manuscript is available on our site with no access controls, subscription charges or pay-per-view fees (<http://bmjopen.bmj.com>).

If you have any questions on BMJ Open's open peer review process please email [info.bmjopen@bmj.com](mailto:info.bmjopen@bmj.com)

# BMJ Open

## Antithrombotic management of patients with acute coronary syndromes and atrial fibrillation undergoing coronary stenting: a prospective, observational, nationwide study

|                               |                                                                                                                                                                                                                                                                                                                                                                                                    |
|-------------------------------|----------------------------------------------------------------------------------------------------------------------------------------------------------------------------------------------------------------------------------------------------------------------------------------------------------------------------------------------------------------------------------------------------|
| Journal:                      | <i>BMJ Open</i>                                                                                                                                                                                                                                                                                                                                                                                    |
| Manuscript ID                 | bmjopen-2020-041044                                                                                                                                                                                                                                                                                                                                                                                |
| Article Type:                 | Original research                                                                                                                                                                                                                                                                                                                                                                                  |
| Date Submitted by the Author: | 28-May-2020                                                                                                                                                                                                                                                                                                                                                                                        |
| Complete List of Authors:     | De Luca, Leonardo; European Hospital, Department of Cardiology<br>Rubboli, Andrea<br>Bolognese, Leonardo<br>Gonzini, Lucio<br>Urbinati, Stefano; Ospedale Bellaria Carlo Alberto Pizzardi, Cardiology<br>Murrone, Adriano<br>Scotto di Uccio, Fortunato<br>Ferrari, Fabio<br>Lucà, Fabiana<br>Caldarola, Pasquale<br>Lucci, donata<br>Gabielli, Domenico<br>Di Lenarda, Andrea<br>Gulizia, Michele |
| Keywords:                     | Adult cardiology < CARDIOLOGY, Coronary heart disease < CARDIOLOGY, Cardiac Epidemiology < CARDIOLOGY, Coronary intervention < CARDIOLOGY, Myocardial infarction < CARDIOLOGY                                                                                                                                                                                                                      |
|                               |                                                                                                                                                                                                                                                                                                                                                                                                    |

SCHOLARONE™  
Manuscripts

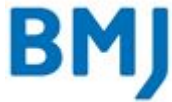

I, the Submitting Author has the right to grant and does grant on behalf of all authors of the Work (as defined in the below author licence), an exclusive licence and/or a non-exclusive licence for contributions from authors who are: i) UK Crown employees; ii) where BMJ has agreed a CC-BY licence shall apply, and/or iii) in accordance with the terms applicable for US Federal Government officers or employees acting as part of their official duties; on a worldwide, perpetual, irrevocable, royalty-free basis to BMJ Publishing Group Ltd ("BMJ") its licensees and where the relevant Journal is co-owned by BMJ to the co-owners of the Journal, to publish the Work in this journal and any other BMJ products and to exploit all rights, as set out in our [licence](#).

The Submitting Author accepts and understands that any supply made under these terms is made by BMJ to the Submitting Author unless you are acting as an employee on behalf of your employer or a postgraduate student of an affiliated institution which is paying any applicable article publishing charge ("APC") for Open Access articles. Where the Submitting Author wishes to make the Work available on an Open Access basis (and intends to pay the relevant APC), the terms of reuse of such Open Access shall be governed by a Creative Commons licence – details of these licences and which [Creative Commons](#) licence will apply to this Work are set out in our licence referred to above.

Other than as permitted in any relevant BMJ Author's Self Archiving Policies, I confirm this Work has not been accepted for publication elsewhere, is not being considered for publication elsewhere and does not duplicate material already published. I confirm all authors consent to publication of this Work and authorise the granting of this licence.

1  
2  
3 **Antithrombotic management of patients with acute coronary syndromes and**  
4 **atrial fibrillation undergoing coronary stenting: a prospective, observational,**  
5 **nationwide study**  
6  
7  
8  
9

10  
11 Leonardo De Luca, MD, PhD, FACC, FESC<sup>1</sup>; Andrea Rubboli, MD, FESC<sup>2</sup>;  
12 Leonardo Bolognese, MD, FESC<sup>3</sup>; Lucio Gonzini, BSc<sup>4</sup>; Stefano Urbinati, MD,  
13 FESC<sup>5</sup>; Adriano Murrone, MD<sup>6</sup>; Fortunato Scotto di Uccio, MD<sup>7</sup>; Fabio Ferrari, MD<sup>8</sup>;  
14 Fabiana Lucà, MD<sup>9</sup>; Pasquale Caldarola, MD<sup>10</sup>; Donata Lucci, BSc<sup>4</sup>; Domenico  
15 Gabrielli, MD, FACC, FESC<sup>11</sup>; Andrea Di Lenarda, MD, FESC<sup>12</sup>; Michele Massimo  
16 Gulizia, MD, FACC, FESC<sup>13</sup>; on behalf of the MATADOR-PCI Investigators\*

17  
18  
19  
20  
21  
22  
23  
24  
25 <sup>1</sup>Division of Cardiology, A.O. San Camillo-Forlanini, Roma; <sup>2</sup>Division of Cardiology, Ospedale  
26 S. Maria delle Croci, Ravenna; <sup>3</sup>Department of Cardio-neuro-vascular Sciences, Ospedale S.  
27 Donato, Arezzo; <sup>4</sup>ANMCO Research Center, Firenze; <sup>5</sup>Division of Cardiology, Ospedale  
28 Bellaria, Bologna; <sup>6</sup>Division of Cardiology, Ospedale di Città di Castello (PG); <sup>7</sup>Division of  
29 Cardiology, Ospedale del Mare, Napoli; <sup>8</sup>Division of Cardiology, A. O. S Luigi Gonzaga,  
30 Orbassano (TO); <sup>9</sup>Division of Cardiology, Grande Ospedale Metropolitano, Azienda Bianchi  
31 Melacrino Morelli, Reggio Calabria; <sup>10</sup>Division of Cardiology, Ospedale S. Paolo, Bari;  
32 <sup>11</sup>Division of Cardiology, A. Murri Hospital, Fermo; <sup>12</sup>Division of Cardiology, Azienda Sanitaria  
33 Universitaria Integrata di Trieste; <sup>13</sup>Division of Cardiology, Garibaldi-Nesima Hospital, Catania,  
34 Italy.  
35  
36  
37  
38

39 \*See Appendix for a complete list of centres and Investigators

40  
41 Running title: MATADOR-PCI Study

42  
43 Clinical Trial Registration. URL: <http://www.clinicaltrials.gov>. Unique identifier:  
44 NCT03656523.  
45

46  
47 Word count: 3160; 39 references, 2 Tables, 4 Figures  
48  
49

50  
51 **Corresponding author:**

52  
53 Leonardo De Luca, MD, PhD, FACC, FESC  
54 Department of Cardiosciences, Division of Cardiology,  
55 Azienda Ospedaliera San Camillo Forlanini  
56 Circonvallazione Gianicolense, 87, 00152 Roma, Italy  
57 Email: [leo.deluca@libero.it](mailto:leo.deluca@libero.it); Phone: +39- 06-58704419; Fax +39-06-5870 4361  
58 Centro Studi ANMCO, Via Alfonso La Marmora, 34 - 50121 Firenze, Italy  
59 [centrostudi@anmco.it](mailto:centrostudi@anmco.it); Tel +39 055/5101361, fax +39 055/5101310  
60

## ABSTRACT

**Objective.** The aim of the study was to assess current management of patients with atrial fibrillation (AF) and acute coronary syndromes (ACS) undergoing coronary stenting.

**Design.** Non-interventional, prospective, nationwide study.

**Setting.** 76 private or public cardiology centers in Italy.

**Participants.** ACS patients with concomitant AF undergoing percutaneous coronary intervention (PCI).

**Primary and secondary outcome measures.** To obtain accurate and up-to-date information on pharmacological management of patients with AF admitted for an ACS and undergoing PCI with stent implantation.

**Results.** Over a 12-month period, 598 consecutive patients were enrolled: 48.8% with AF at hospital admission and 51.2% developing AF during hospitalization. At discharge, a triple antithrombotic therapy (TAT) was prescribed in 64.8%, dual antiplatelet therapy (DAPT) in 25.7%, and dual antithrombotic therapy (DAT) in 8.8% of patients. Among patients with AF at admission, TAT and DAT were more frequently prescribed compared to new onset AF patients (76.3% vs 53.8% and 12.5% vs 5.3%, respectively; both  $p < 0.0001$ ), while a DAPT was less often used (11.2% vs 39.5%;  $p < 0.0001$ ). At multivariable analysis, a history of major bleeding [odds ratio (OR): 5.40; 95% confidence intervals (CI): 2.42-12.05;  $p < 0.0001$ ] and malignancy (OR: 5.11; 95% CI: 1.77-14.78;  $p = 0.0026$ ) resulted the most important independent predictors of DAT prescription.

**Conclusions.** In this contemporary registry of ACS patients with AF treated with coronary stents, TAT still resulted as the antithrombotic strategy of choice, DAT was reserved for high bleeding risk and DAPT was mainly prescribed in those developing AF during hospitalization.

**Key words:** acute coronary syndromes; atrial fibrillation; percutaneous coronary intervention; stents; direct oral anticoagulants; treatment.

### Strengths and limitations of this study

- Prospective, nationwide observational study
- Contemporary community-based registry evaluating the antithrombotic management of patients with ACS and AF undergoing PCI
- Data limited to the hospitalization period

For peer review only

## INTRODUCTION

Approximately 10% of patients with acute coronary syndromes (ACS) requiring percutaneous coronary intervention (PCI) with stent implantation presents a concomitant atrial fibrillation (AF) (1-11). Such patients theoretically need oral anticoagulation (OAC) and dual antiplatelet therapy (DAPT), a combination known as triple antithrombotic therapy (TAT), in order to decrease both the risk of thromboembolism due to AF and the risk of thrombosis and recurrent ischemic events due to ACS and coronary stents (1-7).

Unsurprisingly, TAT is associated with a high rate of major and fatal bleeding events (12). Recently, several randomized trials demonstrated the favorable safety profile of a double antithrombotic therapy (DAT), which combines OAC with a P2Y12 receptor inhibitor, as compared to TAT (13-17).

After the validation of these novel antithrombotic strategies and the dissemination of direct oral anticoagulants (DOACs) in clinical practice, no nationwide or community-based data describing contemporary pharmacological management of patients with AF and ACS treated with PCI are available. In this regard, the Italian National Association of Hospital Cardiologist (ANMCO) designed the MATADOR-PCI (Management of Antithrombotic TherApy in Patients with Chronic or DevelOping AtRial Fibrillation During Hospitalization for PCI) study, aimed to obtain accurate and up-to-date information concerning management and outcome of patients with AF admitted in cardiology intensive care units (CCUs) for an ACS undergoing PCI with stent implantation.

## METHODS

The MATADOR-PCI was a prospective, observational, nationwide registry of consecutive patients with a confirmed diagnosis of ACS treated with PCI and concomitant AF conducted in Italy during a 1-year period.

All consecutive ACS patients [non-ST elevation-ACS (NSTEMI) or ST-elevation myocardial infarction (STEMI)] undergoing PCI and with AF at the time of hospital admission, either paroxysmal, persistent or permanent, or developing during the index hospitalization were included. Patients admitted with a diagnosis of ACS at the time of enrolment but not confirmed during hospitalization, ACS treated medically, with surgical revascularization or with percutaneous coronary balloon angioplasty without stent implantation, and those not giving informed consent were excluded from the survey.

Enrolment was made at hospital discharge.

ANMCO invited to participate in this study all Italian cardiology centers with a CCU and a catheterization laboratory performing at least 400 PCI per year (medium-high volume according to Italian standards), including university teaching hospitals, general and regional hospitals, and private clinics. No specific protocols or recommendations for evaluation, management, and/or treatment have been put forth during this observational study.

However, current guidelines for the management of patients with AF, myocardial revascularization and ACS have been discussed during the investigator meetings.

### Data collection and data quality

Data on demographics, cardiovascular and non-cardiovascular medical history, previous interventional procedures, type of ACS, type of AF, the timing of AF onset (if AF occurred during hospitalization), in-hospital management, pharmacological treatment, timing of PCI, severity and extension of coronary artery disease, number and type of stent, laboratory values, ECG characteristics, hemodynamic parameters, and in-hospital major clinical events were collected.



1  
2  
3 Myocardial infarction was defined according to the third universal definition of MI (18). Stroke  
4 was identified as an acute neurologic deficit lasting >24 hours and affecting the ability to perform  
5 daily activities with or without confirmation by imaging techniques. Stent thrombosis was defined  
6 according to the Academic Research Consortium (ARC) recommendations (19). Bleeding events  
7 were defined according to the Bleeding Academic Research Consortium (BARC) criteria (20). A  
8 major bleeding was defined as BARC  $\geq 3$ .

9  
10 At each site, the principal investigator was responsible for screening eligible consecutive patients.  
11 Data were collected using a web-based, electronic CRF with the central database located at the  
12 ANMCO Research Center. By using a validation plan, integrated in the data entry software, data  
13 were checked for missing or contradictory entries and values out of the normal range.  
14  
15

### 16 17 18 19 20 21 22 23 24 25 26 27 28 **Patient consent and ethical approval**

29 All patients were informed of the nature and aims of the study and asked to sign an informed  
30 consent for the anonymous management of their individual data. Local Institutional Review  
31 Boards (IRB) approved the study protocol according to the current Italian rules.  
32  
33

34 The study was conducted in accordance with the Declaration of Helsinki, the Good Clinical  
35 Practice guidelines and the applicable local legislations of non-interventional studies. The  
36 MATADOR-PCI study is registered at ClinicalTrials.gov (NCT03656523).  
37  
38  
39  
40  
41  
42  
43  
44  
45

### 46 47 48 49 50 51 52 53 54 55 56 57 58 59 60 **Statistical analysis**

Considering the explorative and observational nature of the study, no formal sample size  
calculation has been performed. However, considering the number of ACS patients with AF  
at the time of hospital admission or developing AF during the index hospitalization enrolled  
in previous snapshots performed in Italy and endorsed by ANMCO in the last 15 years (21),  
it was estimated to include approximately 500 patients (8% of ACS patients undergoing PCI  
in 1 year in about 100 centers) to allow for a representative national cohort in terms of

1  
2  
3 geographical distribution and well balanced in terms of complexity (e.g. PCI volume,  
4  
5 cardiac surgery).  
6

7 Normally distributed variables were expressed as mean  $\pm$  standard deviation (SD), and  
8  
9 compared using the Student t test, whereas non-normally distributed variables as median and  
10  
11 interquartile range (IQR) and compared with the Mann-Whitney U test. Categorical  
12  
13 variables were reported as numbers and percentages and compared using the chi-squared test  
14  
15 or Fisher exact tests, as appropriate.  
16  
17

18 The study cohort was stratified according to the two pre-specified groups of patients: (1)  
19  
20 those with AF at the time of hospital admission and (2) those developing AF after hospital  
21  
22 admission for an ACS.  
23

24 Clinically relevant variables which were significant at univariate analysis were included in a  
25  
26 multivariable model (logistic regression) was performed using significant variables at  
27  
28 univariate analysis in order to identify the independent predictors of DAT prescription at  
29  
30 discharge. The variables included in the logistic model were: age (<65 reference group, 65-  
31  
32 74,  $\geq$ 75 years), gender, onset of AF (at admission vs during hospitalization), type of ACS  
33  
34 (STEMI vs NSTEMI-ACS), diabetes, malignancy, major bleeding (history or occurred during  
35  
36 hospitalization). When more than two categories were present, dummy variables were  
37  
38 introduced to define a reference group.  
39  
40

41 A p value < 0.05 was considered statistically significant. All tests were 2-sided. Analyses  
42  
43 were performed with SAS system software, version 9.24.  
44  
45  
46  
47  
48  
49  
50  
51  
52  
53  
54  
55  
56  
57  
58  
59  
60

## RESULTS

Each site started patient enrollment after local IRB approval. Therefore, data were collected in different periods of consecutive 12 months in each site between August 2018 and December 2019. The study has been carried out in 76 cardiology centers [68 (89.5%) with a 24 hours/7 days primary PCI service and 19 (25.0%) with also a cardiac surgery onsite], well representing the Italian cardiology reality in terms of geographical distribution and level of hospital technology. Five-hundred-ninety-eight consecutive patients have been enrolled: 292 (48.8%) with AF at hospital admission and 306 (51.2%) developing AF during the index hospitalization. Among this latter group, 131 (42.8%) developed AF before and 175 (57.2%) after PCI; the median time from admission to AF onset was 18.0 (IQR 1.0-49.0) hours. Among the 211 patients with AF at admission and a history of AF, 116 (55.0%) had a permanent AF.

Baseline characteristics of the study population are shown in Table 1. The mean age of enrolled patients was  $73\pm 10$  years, 70% were male, 33% diabetics and 26% had prior coronary revascularization. Patients with AF at admission presented more frequently a diagnosis of NSTEMI-ACS and were older, with a higher incidence of prior episodes of AF and major risk factors compared to patients developing AF during hospitalization (Table 1). The mean CHA<sub>2</sub>DS<sub>2</sub>-VASc was  $4.1\pm 1.5$  and  $3.6\pm 1.5$  ( $p=0.003$ ), while the HAS-BLEED was  $2.4\pm 1.1$  and  $2.1\pm 0.9$  ( $p=0.02$ ), in patients with AF at admission or developing AF during the hospitalization, respectively.

At the time of admission, 178 (29.8%) were receiving acetylsalicylic acid (ASA), 32 (5.4%) a DAPT and 210 (35%) an OAC (this latter more frequently used in patients with AF at admission compared to the other group) (Table 1).

### Antithrombotic therapy in the peri-procedural period

A pretreatment with DAPT was employed in 345 (57.8%) patients, without differences between the two groups. Among the 210 patients on chronic OAC, it was interrupted before

1  
2  
3 PCI in 163 (77.6%).  
4

5 Table 2 shows the angiographic and procedural variables of enrolled patients. A radial  
6 approach was used in 86%, a multivessel disease was present in 51%, and a drug-eluting  
7 stent (DES) was implanted in 98% of patients. A complete revascularization was obtained in  
8  
9  
10  
11  
12 70% of cases.  
13  
14  
15

### 16 **In-hospital clinical events**

17  
18 The median duration of hospitalization in cardiology wards was 8 [IQR 5-12] days (7 [IQR  
19 5-9] vs 9 [IQR 6-13] days for patients with AF at admission or new onset AF, respectively;  
20  
21 p<0.0001). Among the 588 (98.3%) patients discharged alive, a sinus rhythm was present in  
22  
23 362 (61.6%) [106 (36.9%) with AF at admission and 256 (85.1%) new onset AF; p<0.0001].  
24  
25 In patients with new onset AF, the median duration of the arrhythmia was 4 (IQR 1.0-26.0)  
26  
27 hours.  
28  
29  
30

31 In-hospital clinical events are shown in Figure 1. An urgent revascularization occurred in  
32  
33 6.9%, a thromboembolic or major bleeding event in 3% and a definite stent thrombosis in  
34  
35 0.5% of cases, without differences between the two groups.  
36  
37  
38  
39

### 40 **Antithrombotic therapies at discharge**

41  
42 The single antithrombotic compounds prescribed at discharge are shown in Figure 2.  
43  
44 A DAPT was prescribed in 26%, TAT in 65% and DAT in 9% of patients (Figure 3).  
45  
46 Among patients with AF at admission, TAT and DAT were more frequently prescribed  
47  
48 compared to new onset AF patients (76.3% vs 53.8% and 12.5% vs 5.3%, respectively; both  
49  
50 p<0.0001), while a DAPT was less often used (11.2% vs 39.5%; p<0.0001) (Figure 3).  
51  
52 DOACs were largely used in both patients receiving TAT (84.3%) and DAT (84.6%).  
53  
54 At multivariable analysis, history of major bleeding [odds ratio (OR): 5.40; 95% confidence  
55  
56 intervals (CI): 2.42-12.05; p<0.0001] and malignancy (OR: 5.11; 95% CI: 1.77-14.78;  
57  
58 p=0.0026) resulted the most important independent predictors of DAT prescription (Figure  
59  
60

1  
2  
3  
4  
5  
6  
7  
8  
9  
10  
11  
12  
13  
14  
15  
16  
17  
18  
19  
20  
21  
22  
23  
24  
25  
26  
27  
28  
29  
30  
31  
32  
33  
34  
35  
36  
37  
38  
39  
40  
41  
42  
43  
44  
45  
46  
47  
48  
49  
50  
51  
52  
53  
54  
55  
56  
57  
58  
59  
60

4).

For peer review only

## DISCUSSION

The major findings of this nationwide, contemporary, prospective registry of unselected ACS patients with concomitant AF undergoing PCI are the following: 1. AF at admission is associated with a high incidence of major risk factors while new onset AF more frequently develops after STEMI; 2. TAT is still the antithrombotic strategy of choice in AF patients undergoing PCI, especially in those with AF at admission, while DAT is reserved for patients deemed at high bleeding risk; 3. A quarter of patients did not receive any OAC and approximately 40% of patients with new onset AF has been discharged on DAPT.

It is estimated that one out of ten ACS patients requiring PCI with stent implantation may present AF prior to or occurring during the index hospitalization (1-3). In this latter group, the relative risk of developing AF is usually highest at the onset of ischemia, it diminishes over time and is higher in those with greater clinical severity of ACS (22), as confirmed by our data. Despite its relatively frequent occurrence and the many etiologic factors involved in its pathogenetic condition, the short- or long-term prognostic significance of new-onset AF complicating ACS remains unclear (22-25). In our series of ACS patients treated with contemporary PCI strategies, as documented by the very high rates of transradial approach and DES implanted, new onset AF patients presented a slightly higher, not significant, rate of in-hospital events as compared to those with AF at admission. This finding can be related to the more frequent presence of STEMI and haemodynamic instability among patients developing AF during the index hospitalization.

The pharmacological management of patients with AF undergoing PCI requires a careful balance of the risk of thromboembolic and atherothrombotic events against the increased chance of bleeding, since most AF patients are likely to receive TAT for the prevention of stroke, stent thrombosis or recurrent cardiac events (26). In recent years, several randomized controlled trials including an overall population of more than 10,000 patients, assessed the safety of replacing TAT with DAT in AF patients treated with PCI (15-18,26). Meta-analyses of these trials showed that DAT is associated with reduced risk for major bleeding

1  
2  
3 compared with TAT, regardless of several features including clinical risk profile and PCI  
4 complexity (27,28). However, low-certainty evidence showed inconclusive effects of DAT  
5 versus TAT on risks for mortality, stroke and stent thrombosis (27,28).  
6  
7

8  
9 The recent 2019 ACC/AHA/HRS guidelines for AF (29) recommend DAT with DOACs as an  
10 alternative to TAT to reduce bleeding, while, in the ESC guidelines released in 2016 (1), this  
11 indication is restricted to patients at baseline high bleeding risk. Based on the North American  
12 expert consensus document (7), the default approach is DAT, and short-term TAT can be  
13 considered in patients who have high thrombotic risk and low bleeding risk. Our data suggest  
14 that, although DOACs nearly replaced vitamin K antagonists, TAT is still largely used in  
15 contemporary clinical practice. This appears in accordance with the recent observation of an  
16 increased early stent thrombosis with DAT as compared to TAT with DOAC (30) supporting an  
17 initial course of TAT in all ACS patients with AF (31,32). On the other hand, as recommended by  
18 2016 ESC guidelines on the management of AF (1) that did not consider all the evidence coming  
19 from recent trials, DAT was restricted to patients at high bleeding risk. These findings are  
20 consistent with previous nationwide registries or surveys conducted in Europe before the  
21 availability of newer evidence in this field (33,34), emphasizing the need for educational  
22 campaigns in order to translate recent evidence and guidelines recommendation into clinical  
23 practice.  
24  
25

26  
27 The antithrombotic strategy is particularly challenging in patients who develop AF during an  
28 ACS episode, especially those with paroxysmal episodes of AF (22,35). Indeed, although it  
29 is unclear whether new onset AF associated with ACS has the same thromboembolic risk as  
30 a prior history of AF, substantial risk of AF recurrence following acute ischemia exists in  
31 these subjects (22). In this regard, a consensus document by the European Heart Rhythm  
32 Association (6) suggests that OAC should be generally prescribed in new onset AF,  
33 according to the individual risk of stroke, in combination with antiplatelet agents. In our  
34 registry, a quarter of the overall cohort was treated with DAPT and 40% of patients  
35  
36  
37  
38  
39  
40  
41  
42  
43  
44  
45  
46  
47  
48  
49  
50  
51  
52  
53  
54  
55  
56  
57  
58  
59  
60

1  
2  
3 developing AF during hospitalization was discharged without any OAC prescription,  
4 probably because the AF episode has been considered a transient epiphenomenon triggered  
5 by the acute myocardial ischemia. The low utilization of OAC in this population is  
6 consistent with a large Swedish registry (36) and other retrospective studies (37-39) on  
7 ACS. In a recent analysis of 149 patients developing AF during hospitalization for ACS and  
8 treated by PCI, DAT was strongly associated with mortality at long-term follow-up,  
9 suggesting that an intensified antithrombotic regimen should be considered also in this high-  
10 risk patient population (39). Studies specific to new-onset AF following ACS are needed in  
11 order to better identify those requiring anticoagulation and its optimal duration.  
12  
13  
14  
15  
16  
17  
18  
19  
20  
21  
22  
23  
24

### 25 **Study Limitations**

26  
27 Our study must be evaluated in the light of the known limitations of observational, cross-sectional  
28 studies. In addition, the data reported in the present analysis are limited to the time of  
29 hospitalization. However, a clinical follow-up at 6 months from enrolment is ongoing and will  
30 assess clinical outcomes and the adherence to prescribed antithrombotic strategy. Finally, even  
31 though the participating centers were asked to include in the registry all consecutive ACS patients  
32 with AF requiring coronary stents, we were not able to verify the enrolment process due to the  
33 absence of administrative auditing. However, based on the number of AF patients enrolled in  
34 previous nationwide registry of ACS, we believe that the rate of patients enrolled is reliable and it  
35 is unlikely that a selective enrolment in a few sites may have substantially changed the study  
36 results.  
37  
38  
39  
40  
41  
42  
43  
44  
45  
46  
47  
48  
49  
50  
51

### 52 **CONCLUSIONS**

53  
54 This nationwide registry provides unique insights into the current antithrombotic  
55 management of patients with ACS and concomitant AF undergoing coronary stenting.  
56  
57 Although recent evidence showed the safety of DAT in this population, our data  
58  
59  
60



1  
2  
3 demonstrate that TAT is still largely prescribed while DAT is reserved for patients deemed  
4  
5 at high bleeding risk. At discharge, an OAC was not prescribed in 25% of the overall  
6  
7 population and in 40% of patients developing AF during hospitalization.  
8  
9  
10  
11  
12  
13  
14  
15  
16  
17  
18  
19  
20  
21  
22  
23  
24  
25  
26  
27  
28  
29  
30  
31  
32  
33  
34  
35  
36  
37  
38  
39  
40  
41  
42  
43  
44  
45  
46  
47  
48  
49  
50  
51  
52  
53  
54  
55  
56  
57  
58  
59  
60

For peer review only

### **Author contribution**

The Steering Committee designed the study. All authors participated in the conduct of the study and contributed to the interpretation of the results. LDL drafted the manuscript. LG and DL analyzed the data. All authors read, revised and approved the final version of the article.

### **Technical appendix**

Data can be accessed on request to Centro Studi ANMCO, Florence, Italy.

### **Funding**

The sponsor of the study was the Heart Care Foundation, a non-profit independent organization, which also owns the database. Database management, quality control of the data and data analyses were under the responsibility of the ANMCO Research Centre of the Heart Care Foundation. The study was partially supported by an unrestricted grant by Boehringer Ingelheim, Pharma GmbH & CoKG. No compensations were provided to participating sites, investigators, nor members of the Steering Committee. The Steering Committee of the study had full access to all the data in this study and takes complete responsibility for the integrity of the data and the accuracy of the data analysis.

### **Conflicts of interest**

Dr. De Luca has received speakers honoraria from Bayer, Boehringer Ingelheim, Daiichi Sankyo, Pfizer/BMS outside the submitted work; All other authors have reported that no potential conflicts of interest exist with any companies/organizations whose products or services may be discussed in this article. Gonzini and Lucci are employees of Heart Care

1  
2  
3  
4  
5  
6  
7  
8  
9  
10  
11  
12  
13  
14  
15  
16  
17  
18  
19  
20  
21  
22  
23  
24  
25  
26  
27  
28  
29  
30  
31  
32  
33  
34  
35  
36  
37  
38  
39  
40  
41  
42  
43  
44  
45  
46  
47  
48  
49  
50  
51  
52  
53  
54  
55  
56  
57  
58  
59  
60

Foundation, which conducted the study with an unrestricted grant of research from  
Boehringer Ingelheim, Pharma GmbH & CoKG.

For peer review only

## REFERENCES

1. Kirchhof P, Benussi S, Kotecha D, et al. 2016 ESC Guidelines for the management of atrial fibrillation developed in collaboration with EACTS. *Eur Heart J* 2016;37:2893-2962.
2. Lip GYH, Collet J, Haude M, et al. 2018 Joint European consensus document on the management of antithrombotic therapy in atrial fibrillation patients presenting with acute coronary syndrome and/or undergoing percutaneous cardiovascular interventions: a joint consensus document of the European Heart Rhythm Association (EHRA), European Society of Cardiology Working Group on Thrombosis, European Association of Percutaneous Cardiovascular Interventions (EAPCI), and European Association of Acute Cardiac Care (ACCA) endorsed by the Heart Rhythm Society (HRS), Asia-Pacific Heart Rhythm Society (APHRS), Latin America Heart Rhythm Society (LAHRS), and Cardiac Arrhythmia Society of Southern Africa (CASSA). *Europace* 2019;21:192–193
3. Smith SC Jr., Feldman TE, Hirshfeld JW Jr., et al. ACC/AHA/SCAI 2005 guideline update for percutaneous coronary intervention—summary article: a report of the American College of Cardiology/American Heart Association Task Force on Practice Guidelines (ACC/AHA/SCAI Writing Committee to Update the 2001 Guidelines for Percutaneous Coronary Intervention). *J Am Coll Cardiol* 2006;47:216–35.
4. Nieuwlaat R, Capucci A, Camm AJ, et al., for the European Heart Survey Investigators. Atrial fibrillation management: a prospective survey in ESC member countries: the Euro Heart Survey on Atrial Fibrillation. *Eur Heart J* 2005;26:2422–34.
5. Valgimigli M, Bueno H, Byrne RA, et al. 2017 ESC focused update on dual antiplatelet therapy in coronary artery disease developed in collaboration with EACTS. *Eur Heart J* 2018;39:213-260.

- 1  
2  
3 6. Steffel J, Verhamme P, Potpara TS, et al. The 2018 European Heart Rhythm Association  
4 practical guide on the use of non-vitamin K antagonist oral anticoagulants in patients  
5 with atrial fibrillation *Eur Heart J* 2018;39:1330-1393.  
6  
7
- 8  
9  
10 7. Angiolillo DJ, Goodman SG, Bhatt DL, et al. Antithrombotic therapy in patients with  
11 atrial fibrillation treated with oral anticoagulation undergoing percutaneous coronary  
12 intervention: a North American perspective—2018 update. *Circulation* 2018;138:527-536  
13  
14
- 15  
16  
17 8. Goldberg RJ, Yarzebski J, Lessard D, et al. Recent trends in the incidence rates of and  
18 death rates from atrial fibrillation complicating initial acute myocardial infarction: a  
19 community-wide perspective. *Am Heart J* 2002;143:519–527.  
20  
21
- 22  
23  
24 9. Wong CK, White HD, Wilcox RG, et al. New atrial fibrillation after acute myocardial  
25 infarction independently predicts death: the GUSTO-III experience. *Am Heart J*  
26  
27  
28 2000;140:878–885.  
29
- 30  
31 10. Wong CK, White HD, Wilcox RG, et al. Significance of atrial fibrillation during  
32 acute myocardial infarction, and its current management: insights from the GUSTO-3  
33  
34  
35 trial. *Card Electrophysiol Rev* 2003;7:201–207.  
36
- 37  
38 11. McManus DD, Huang W, Domakonda KV, et al. Trends in Atrial Fibrillation in  
39 Patients Hospitalized with an Acute Coronary Syndrome. *Am J Med* 2012;125:1076–  
40  
41  
42 1084.  
43
- 44  
45 12. van Rein N, Heide-Jørgensen U, Lijfering WM, Dekkers OM, Sørensen HT,  
46 Cannegieter SC. Major bleeding rates in atrial fibrillation patients on single, dual, or  
47  
48  
49 triple antithrombotic therapy. *Circulation* 2019;139:775-786.  
50
- 51  
52 13. Dewilde WJ, Oirbans T, Verheugt FW, et al. Use of clopidogrel with or without  
53 aspirin in patients taking oral anticoagulant therapy and undergoing percutaneous  
54  
55  
56 coronary intervention: an open-label, randomised, controlled trial. *Lancet*  
57  
58  
59 2013;381:1107-1115.  
60

- 1  
2  
3 14. Gibson CM, Mehran R, Bode C, et al. Prevention of bleeding in patients with atrial  
4  
5 fibrillation undergoing PCI *N Engl J Med* 2016;375:2423-2434.  
6  
7
- 8 15. Cannon CP, Bhatt DL, Oldgren J, et al. Dual Antithrombotic therapy with dabigatran  
9  
10 after PCI in atrial fibrillation. *N Engl J Med* 2017;377:1513-1524.  
11
- 12 16. Lopes RD, Heizer G, Aronson R, et al. Antithrombotic therapy after acute coronary  
13  
14 syndrome or PCI in atrial fibrillation. *N Engl J Med* 2019;380:1509-1524.  
15  
16
- 17 17. Vranckx P, Valgimigli M, Eckardt L, et al. Edoxaban-based versus vitamin K  
18  
19 antagonist-based antithrombotic regimen after successful coronary stenting in patients  
20  
21 with atrial fibrillation (ENTRUST-AF PCI): a randomised, open-label, phase 3b trial.  
22  
23 *Lancet* 2019;394:1335-1343.  
24  
25
- 26 18. Thygesen K, Alpert JS, Jaffe AS, Simoons ML, Chaitman BR, White HD; Joint  
27  
28 ESC/ACCF/AHA/WHF Task Force for Universal Definition of Myocardial Infarction.  
29  
30 Third universal definition of myocardial infarction. *J Am Coll Cardiol* 2012;60:1581-98.  
31  
32
- 33 19. Cutlip DE, Windecker S, Mehran R, et al.; Academic Research Consortium. Clinical  
34  
35 end points in coronary stent trials: a case for standardized definitions. *Circulation*  
36  
37 2007;115:2344–2351.  
38  
39
- 40 20. Mehran R, Rao SV, Bhatt DL, et al. Standardized bleeding definitions for  
41  
42 cardiovascular clinical trials: A consensus report from the Bleeding Academic Research  
43  
44 Consortium. *Circulation* 2011;123:2736-2747.  
45  
46
- 47 21. De Luca L, Casella G, Rubboli A, et al. Recent trends in management and outcome  
48  
49 of patients with acute coronary syndromes and atrial fibrillation. *Int J Cardiol*  
50  
51 2017;248:369-375.  
52  
53
- 54 22. Lau DH, Alasady M, Brooks AG, Sanders P. New-onset atrial fibrillation and acute  
55  
56 coronary syndrome. *Expert Rev Cardiovasc Ther* 2010;8:941-8.  
57  
58  
59  
60

- 1  
2  
3 23. Wong CK, White HD, Wilcox RG, et al. New atrial fibrillation after acute  
4 myocardial infarction independently predicts death: the GUSTO-III experience. *Am*  
5 *Heart J* 2000;140:878–885.  
6  
7
- 8  
9  
10 24. Pizzetti F, Turazza FM, Franzosi MG, et al.; GISSI-3 Investigators. Incidence and  
11 prognostic significance of atrial fibrillation in acute myocardial infarction: the GISSI-3  
12 data. *Heart* 2001;86:527-32.  
13  
14
- 15  
16  
17 25. Zeymer U, Annemans L, Danchin N, et al. Impact of known or new-onset atrial  
18 fibrillation on 2-year cardiovascular event rate in patients with acute coronary  
19 syndromes: results from the prospective EPICOR Registry. *Eur Heart J Acute Cardiovasc*  
20 *Care* 2018; doi:10.1177/2048872618769057.  
21  
22
- 23  
24  
25 26. Capodanno D, Huber K, Mehran R, et al. Management of Antithrombotic Therapy in  
26 Atrial Fibrillation Patients Undergoing PCI. *Daivide J Am Coll Cardiol* 2019;74:83–99.  
27  
28
- 29  
30  
31 27. Khan SU, Osman M, Khan MU, et al. Dual Versus Triple Therapy for Atrial Fibrillation  
32 After Percutaneous Coronary Intervention: A Systematic Review and Meta-analysis *Ann Intern*  
33 *Med* 2020 Mar 17. Online ahead of print  
34  
35
- 36  
37  
38 28. Lopes RD, Hong H, Harskamp RE, et al. Optimal Antithrombotic Regimens for  
39 Patients With Atrial Fibrillation Undergoing Percutaneous Coronary Intervention: An  
40 Updated Network Meta-analysis. *JAMA Cardiol* 2020 Feb. Online ahead of print.  
41  
42
- 43  
44  
45 29. January CT, Wann LS, Calkins H, et al. 2019 AHA/ACC/HRS Focused Update of  
46 the 2014 AHA/ACC/HRS Guideline for the Management of Patients With Atrial  
47 Fibrillation: A Report of the American College of Cardiology/American Heart  
48 Association Task Force on Clinical Practice Guidelines and the Heart Rhythm Society. *J*  
49 *Am Coll Cardiol* 2019;74:104-132.  
50  
51
- 52  
53  
54 30. Gargiulo G, Goette A, Tijssen J, et al. Safety and efficacy outcomes of double vs.  
55 triple antithrombotic therapy in patients with atrial fibrillation following percutaneous  
56 coronary intervention: a systematic review and meta-analysis of non-vitamin K  
57  
58  
59  
60

- 1  
2  
3 antagonist oral anticoagulant-based randomized clinical trials. *Eur Heart J* 2019;40:3757-  
4  
5 3767.  
6  
7  
8 31. Alexander JH, Wojdyla D, Vora AN, et al. The Risk / Benefit Tradeoff of Antithrombotic  
9  
10 Therapy in Patients with Atrial Fibrillation Early and Late After an Acute Coronary Syndrome  
11  
12 or Percutaneous Coronary Intervention: Insights from AUGUSTUS. *Circulation* 2020. Online  
13  
14 ahead of print.  
15  
16  
17 32. Rubboli A, Lip GYH. Algorithm for the management of antithrombotic therapy in  
18  
19 atrial fibrillation patients undergoing percutaneous coronary intervention: an updated  
20  
21 proposal based on efficacy considerations. *Eur Heart J Cardiovasc Pharmacother.* 2020,  
22  
23 in press doi: 10.1093/ehjcvp/pvaa003.  
24  
25  
26 33. Lamberts M, Gislason GH, Olesen JB, et al. Oral anticoagulation and antiplatelets in  
27  
28 atrial fibrillation patients after myocardial infarction and coronary intervention. *J Am*  
29  
30 *Coll Cardiol* 2013;62:981–9.  
31  
32  
33 34. Lane DA, Dagres N, Dan G, et al. Antithrombotic treatment in patients with atrial  
34  
35 fibrillation and acute coronary syndromes: results of the European Heart Rhythm  
36  
37 Association survey. *Europace* 2019;21:1116–1125.  
38  
39  
40 35. Rubboli A, Agewall S, Huber K, Lip GYH. New-onset atrial fibrillation after  
41  
42 percutaneous coronary intervention with stent: updated proposal of an algorithm for the  
43  
44 choice of oral anticoagulant and its dose. *Eur J Intern Med* 2017;40:e11–12.  
45  
46  
47 36. Stenstrand U, Lindback J, Wallentin L. Anticoagulation therapy in atrial fibrillation  
48  
49 in combination with acute myocardial infarction influences long-term outcome: a  
50  
51 prospective cohort study from the Register of Information and Knowledge About  
52  
53 Swedish Heart Intensive Care Admissions (RIKS-HIA). *Circulation* 2005;112:3225-  
54  
55 3231.  
56  
57  
58  
59  
60



- 1  
2  
3 37. Mehta RH, Dabbous OH, Granger CB, et al. Comparison of outcomes of patients  
4 with acute coronary syndromes with and without atrial fibrillation. *Am J Cardiol*  
5 2003;92:1031-1036.  
6  
7  
8  
9  
10 38. Lau DH, Huynh LT, Chew DP, et al. Prognostic impact of types of atrial fibrillation  
11 in acute coronary syndromes. *Am J Cardiol* 2009;104:1317-1323.  
12  
13  
14 39. Hofer F, Kazem N, Hammer A, et al. Long-Term Prognosis of De-Novo Atrial  
15 Fibrillation during Acute Myocardial Infarction – The Impact of Anti-Thrombotic  
16 Treatment Strategies. *Eur Heart J Cardiovasc Pharmacother* 2020, in press  
17 <https://doi.org/10.1093/ehjcvp/pvaa027>  
18  
19  
20  
21  
22  
23  
24  
25  
26  
27  
28  
29  
30  
31  
32  
33  
34  
35  
36  
37  
38  
39  
40  
41  
42  
43  
44  
45  
46  
47  
48  
49  
50  
51  
52  
53  
54  
55  
56  
57  
58  
59  
60

1  
2  
3 **FIGURE LEGENDS**  
4  
5

6 **Figure 1.** In-hospital clinical events  
7

8 **Figure 2.** Antithrombotic therapies prescribed at discharge  
9

10 **Figure 3 (Central illustration).** Combination of antithrombotic therapies prescribed at discharge.  
11

12  
13 DAPT: dual antiplatelet therapy; DAT: dual antithrombotic therapy; SAPT: single  
14  
15 antiplatelet therapy; TAT: triple antithrombotic therapy  
16

17 **Figure 4.** Independent predictors of DAT prescription at multivariable analysis  
18  
19  
20  
21  
22  
23  
24  
25  
26  
27  
28  
29  
30  
31  
32  
33  
34  
35  
36  
37  
38  
39  
40  
41  
42  
43  
44  
45  
46  
47  
48  
49  
50  
51  
52  
53  
54  
55  
56  
57  
58  
59  
60

**Table 1.** Clinical characteristics, hemodynamic variables, laboratory parameters and antithrombotic therapy at baseline

|                                                 | <b>Overall<br/>(n=598)</b> | <b>AF at<br/>admission<br/>(n=292)</b> | <b>New onset<br/>AF<br/>(n=306)</b> | <b>P<br/>value</b> |
|-------------------------------------------------|----------------------------|----------------------------------------|-------------------------------------|--------------------|
| Age, yrs (mean±SD)                              | 73±10                      | 76±10                                  | 72±10                               | <0.0001            |
| Males, n (%)                                    | 417 (69.7)                 | 203 (69.5)                             | 214 (69.9)                          | 0.91               |
| Body mass index                                 | 27.3±4.3                   | 27.2±4.2                               | 27.3±4.5                            | 0.92               |
| Final diagnosis, n (%)                          |                            |                                        |                                     | <0.0001            |
| STEMI                                           | 273 (45.7)                 | 101 (34.6)                             | 172 (56.2)                          |                    |
| NSTEMI-ACS                                      | 325 (54.3)                 | 191 (65.4)                             | 134 (43.8)                          |                    |
| <i>Clinical history and risk factors, n (%)</i> |                            |                                        |                                     |                    |
| Prior episodes of AF                            | 253 (42.3)                 | 211 (72.3)                             | 42 (13.7)                           | <0.0001            |
| Active smokers                                  | 119 (19.9)                 | 46 (15.8)                              | 73 (23.9)                           | 0.01               |
| Diabetes mellitus                               | 198 (33.1)                 | 109 (37.3)                             | 89 (29.1)                           | 0.03               |
| Hypertension                                    | 467 (78.1)                 | 245 (83.9)                             | 222 (72.6)                          | 0.0008             |
| Hypercholesterolemia                            | 310 (51.8)                 | 155 (53.1)                             | 155 (50.7)                          | 0.55               |
| Peripheral artery disease                       | 51 (8.5)                   | 33 (11.3)                              | 18 (5.9)                            | 0.02               |
| Previous stroke/TIA                             | 66 (11.0)                  | 43 (14.7)                              | 23 (7.5)                            | 0.005              |
| History of angina                               | 177 (29.6)                 | 114 (39.0)                             | 63 (20.6)                           | <0.0001            |
| History of heart failure                        | 72 (12.0)                  | 51 (17.5)                              | 21 (6.9)                            | <0.0001            |
| Previous MI                                     | 135 (22.6)                 | 82 (28.1)                              | 53 (17.3)                           | 0.002              |
| Prior PCI                                       | 143 (23.9)                 | 87 (29.8)                              | 56 (18.3)                           | 0.001              |
| Prior CABG                                      | 28 (4.7)                   | 21 (7.2)                               | 7 (2.3)                             | 0.005              |
| History of major bleeding                       | 16 (2.7)                   | 11 (3.8)                               | 5 (1.6)                             | 0.11               |

|                                       |              |              |              |         |
|---------------------------------------|--------------|--------------|--------------|---------|
| Chronic kidney disease                | 121 (20.2)   | 82 (28.1)    | 39 (12.8)    | <0.0001 |
| COPD                                  | 79 (13.2)    | 43 (14.7)    | 36 (11.8)    | 0.29    |
| Cancer                                | 23 (3.9)     | 15 (5.1)     | 8 (2.6)      | 0.11    |
| <i>Haemodynamic variables</i>         |              |              |              |         |
| Killip III-IV, n (%)                  | 76 (12.7)    | 27 (9.3)     | 49 (16.0)    | 0.13    |
| Electrical instability, n (%)         | 55 (9.2)     | 14 (4.8)     | 41 (13.4)    | 0.0003  |
| SBP, mmHg (mean±SD)                   | 132±26       | 132±25       | 132±27       | 0.85    |
| HR, bpm (mean±SD)                     | 87±26        | 88±28        | 86±25        | 0.22    |
| Ejection fraction, % (mean±SD)        | 46.8±10.4    | 47.0±10.3    | 46.5±10.4    | 0.56    |
| <i>Laboratory parameters, mean±SD</i> |              |              |              |         |
| Hemoglobin, g/dL                      | 13.3±1.9     | 13.2±1.9     | 13.4±1.9     | 0.12    |
| Creatinine, mg/dL                     | 1.2±1.0      | 1.2±0.8      | 1.2±1.1      | 0.03    |
| LDL Cholesterol, mg/dL                | 104±38       | 100±36       | 107±40       | 0.05    |
| Tryglicerides, mg/dL                  | 104 [78-144] | 104 [78-148] | 105 [77-140] | 0.84    |
| Platelets, 10 <sup>5</sup> /mL        | 223±82       | 211±76       | 235±86       | 0.0003  |
| INR                                   | 1.3±0.6      | 1.4±0.7      | 1.1±0.2      | <0.0001 |
| <i>Antithrombotic therapy, n (%)</i>  |              |              |              |         |
| ASA only                              | 146 (24.4)   | 66 (22.6)    | 80 (26.1)    | 0.31    |
| P2Y12 inhibitors only                 | 21 (3.5)     | 11 (3.8)     | 10 (3.3)     | 0.74    |
| DAPT                                  | 32 (5.4)     | 14 (4.8)     | 18 (5.9)     | 0.55    |
| LMWH                                  | 15 (2.5)     | 7 (2.4)      | 8 (2.6)      | 0.87    |
| VKA                                   | 73 (12.2)    | 65 (22.3)    | 8 (2.6)      | <0.0001 |
| DOAC                                  | 137 (22.9)   | 119 (40.8)   | 18 (5.9)     | <0.0001 |

Abbreviations: AF: atrial fibrillation; ASA: acetylsalicylic acid; CABG: coronary artery bypass grafting; COPD: chronic obstructive pulmonary disease; DAPT: dual antiplatelet therapy; DOAC: direct oral anticoagulants; HR: heart rate; INR: international normalized ratio; LDL: low density

1  
2  
3  
4  
5  
6  
7  
8  
9  
10  
11  
12  
13  
14  
15  
16  
17  
18  
19  
20  
21  
22  
23  
24  
25  
26  
27  
28  
29  
30  
31  
32  
33  
34  
35  
36  
37  
38  
39  
40  
41  
42  
43  
44  
45  
46  
47  
48  
49  
50  
51  
52  
53  
54  
55  
56  
57  
58  
59  
60

lipoprotein; LMWH: low-molecular weight heparins; MI: myocardial infarction; NSTEMI: Non-ST elevation acute coronary syndromes; PCI: percutaneous coronary intervention; SBP: systolic blood pressure; STEMI: ST-elevation myocardial infarction; TIA: transient ischemic attack; VKA: vitamin-K antagonists

For peer review only

**Table 2.** Angiographic and procedural variables and antithrombotic therapies administered in the cath lab.

|                                                                     | <b>Overall<br/>(n=598)</b> | <b>AF at<br/>admission<br/>(n=292)</b> | <b>New onset<br/>AF<br/>(n=306)</b> | <b>P<br/>value</b> |
|---------------------------------------------------------------------|----------------------------|----------------------------------------|-------------------------------------|--------------------|
| Radial approach, n (%)                                              | 517 (86.5)                 | 260 (89.0)                             | 257 (84.0)                          | 0.07               |
| Multivessel disease, n (%)                                          | 306 (51.2)                 | 140 (48.0)                             | 166 (54.3)                          | 0.12               |
| Basal TIMI 0/1, n (%)                                               | 226 (38.1)                 | 88 (30.1)                              | 138 (45.1)                          | <0.001             |
| Site of PCI, n (%)                                                  |                            |                                        |                                     |                    |
| Left main                                                           | 44 (7.4)                   | 19 (6.5)                               | 25 (8.2)                            | 0.44               |
| Left anterior descending                                            | 326 (54.5)                 | 155 (53.1)                             | 171 (55.9)                          | 0.49               |
| Circumflex                                                          | 176 (29.4)                 | 82 (28.1)                              | 94 (30.7)                           | 0.48               |
| Right coronary artery                                               | 229 (38.3)                 | 116 (39.7)                             | 113 (36.9)                          | 0.48               |
| Arterial/venous graft                                               | 9 (1.5)                    | 7 (2.4)                                | 2 (0.7)                             | 0.08               |
| Type of stent, n (%)                                                |                            |                                        |                                     |                    |
| BMS                                                                 | 15 (2.5)                   | 9 (3.1)                                | 6 (2.0)                             | 0.38               |
| DES, durable polymer                                                | 363 (60.7)                 | 162 (55.5)                             | 201 (65.7)                          | 0.01               |
| DES, biodegradable polymer                                          | 163 (27.3)                 | 90 (30.8)                              | 73 (23.9)                           | 0.06               |
| DES, polymer-free                                                   | 78 (13.0)                  | 47 (16.1)                              | 31 (10.1)                           | 0.03               |
| >2 stents implanted, n (%)                                          | 115 (19.2)                 | 53 (18.2)                              | 62 (20.3)                           | 0.51               |
| Complete revascularization, n (%)                                   | 421 (70.4)                 | 206 (70.6)                             | 215 (70.3)                          | 0.94               |
| <i>Antithrombotic therapies administered in the cath lab, n (%)</i> |                            |                                        |                                     |                    |
| ASA                                                                 | 31 (5.2)                   | 20 (6.9)                               | 11 (3.6)                            | 0.07               |
| DAPT                                                                | 101 (16.9)                 | 63 (21.6)                              | 38 (12.4)                           | 0.003              |
| GP IIb/IIIa inhibitors                                              | 69 (11.5)                  | 14 (4.8)                               | 55 (18.0)                           | <0.0001            |
| Cangrelor                                                           | 9 (1.5)                    | § (1.4)                                | 5 (1.6)                             | 0.23               |
| Unfractionated heparin                                              | 333 (55.7)                 | 187 (64.0)                             | 146 (47.7)                          | <0.0001            |

1  
2  
3  
4  
5  
6  
7  
8  
9  
10  
11  
12  
13  
14  
15  
16  
17  
18  
19  
20  
21  
22  
23  
24  
25  
26  
27  
28  
29  
30  
31  
32  
33  
34  
35  
36  
37  
38  
39  
40  
41  
42  
43  
44  
45  
46  
47  
48  
49  
50  
51  
52  
53  
54  
55  
56  
57  
58  
59  
60

Abbreviations: ASA: acetylsalicylic acid; BMS: bare metal stent; DAPT: dual antiplatelet therapy; DES: drug-eluting stent; GP IIb/IIIa; glycoprotein IIb/IIIa receptor inhibitors; PCI: percutaneous coronary intervention

For peer review only

## APPENDIX

### Steering Committee

L De Luca (Chairman), A Di Lenarda (co-chairman), MM Gulizia (co-chairman), A Rubboli (co-chairman), L Bolognese, D Gabrielli, A Murrone, F Scotto Di Uccio, S Urbinati

### Coordinating Center

ANMCO Research Center (AP Maggioni, A Lorimer, D Lucci, L Cipressa, G Orsini, L Gonzini)

### Participating Centers and Investigators

Tivoli (A Granatelli, A Posteraro, AM Conti); Orbassano (F Ferrari, M Bianco, MG Perrelli); Reggio Calabria Grande Osp. Metropol. (F Lucà, F Ciancia, S Lanteri); Bari Osp. S. Paolo (P Caldarola, N Locuratolo, D Rutigliano); Caserta AO S. Anna e S. Sebastiano (A Vetrano, A Fusco); Lecce Osp. Vito Fazzi (M Callerame, T Mazzella); Conegliano (L Rivetti, M Centa); Reggio Emilia AUSL RE (A Navazio, M Ferri) Legnano (F Poletti, M Mariani); Pavia Policlinico S. Matteo (S Leonardi, F Fortuni); Palermo PO Cervello (A Ledda, G Geraci) Milano Osp. S. Luca - Istituto Auxologico (S Blengino, V Vaccaro); Milano Centro Cardiologico Monzino (J Campodonico, N Cosentino); Rivoli (I Meynet, MF Lococo); Torino Osp. S. Giovanni Bosco (S Brach Prever, E Petitti); Udine POU S. M. della Misericordia (S Poli, C Lutman); Pesaro (S Maffei, L Scappini); Potenza AO San Carlo (CP La Creta, G Paternò); Roma Osp. S. Spirito (E Olivieri, A Chiera); Catania AO Cannizzaro (F Amico, S Giubilato); Ragusa (A Nicosia, E Puzangara); Savona (M Botta, M Ghione); Genova EO Ospedali Galliera (P Bernabò); Peschiera del Garda Casa di Cura Dr. Pederzoli (A Vicentini, O Spadaro); Rovereto (F Imperadore, G Musuraca); S. M. Capua Vetere (P Iodice, B Bosco); Terni AO S. Maria (P Mezzetti, M De Paolis); Avezzano (L Paraggio, M Santoro); Benevento (M Scherillo, D Formigli); Cefalù Fondazione G. Giglio (P Bonaccorso, M Giovino); Forlì (L Caravita, E Conficoni); Lido di Camaiore (G Casolo, A Lilli); Tricase (M Accogli, S Longo); Napoli Osp. del Mare (B Tuccillo, L Irace); Rho (G De Angelis, S Benincasa); Sassuolo (M Scapinelli, M Camellini); Bari Policlinico (M Pepe, D Zanna); Foggia Osp. Riuniti (ND Brunetti, A Ruggiero); Milano PO San Carlo (A Mafrici, EMP Madonini); Roma Policlinico Umberto I (R Quaglione, FG Biccirè); Torino Osp. Maria Vittoria (M Giammaria, L Coda); Treviglio (PC Sganzerla, A Cardile); Aversa (L Fattore); Belluno (L Mario); Cagliari AO Brotzu (M Porcu); Gravedona (G Giacomarra); Imola (M Li Calzi); San Donà di Piave (C Canali); Andria (M Cannone); Avellino AORN S. Giuseppe Moscati (E Di Lorenzo); Bologna Osp. Maggiore (A Pecoraro); Desio (N Mollichelli); Eboli (G Bottiglieri); Foligno (M Scarpignato); Magenta (A Martinoni); Merate (S Maggiolini); Milano PO San Paolo (C Sponzilli); Napoli AORN Cardarelli (C Mauro); Roma Osp. S. Camillo (RL Putini); Roma Osp. Sant'Andrea (C Autore); San Severo (A Vilella); Varese Osp. di Circolo e Fond. Macchi (A Limido); Brindisi (G Ignone); Castel Volturno (L Argenziano); Milano Osp. Metropolitan Niguarda (F Oliva); Nola (L Caliendo); Pistoia (M Comeglio); Pordenone (E Loiudice); Trento Osp. S. Chiara (R Bonmassari); Viterbo (L Sommariva); Bari Osp. di Venere (M Turturo); Firenze Osp. S. Giovanni di Dio (L Nicolaci); Mirano (S Saccà); Nuoro (G Casu); Pescia (P Giordano); Roma PO S. Filippo Neri (F Colivicchi).



1  
2  
3  
4  
5  
6  
7  
8  
9  
10  
11  
12  
13  
14  
15  
16  
17  
18  
19  
20  
21  
22  
23  
24  
25  
26  
27  
28  
29  
30  
31  
32  
33  
34  
35  
36  
37  
38  
39  
40  
41  
42  
43  
44  
45  
46  
47  
48  
49  
50  
51  
52  
53  
54  
55  
56  
57  
58  
59  
60

FIGURE 1

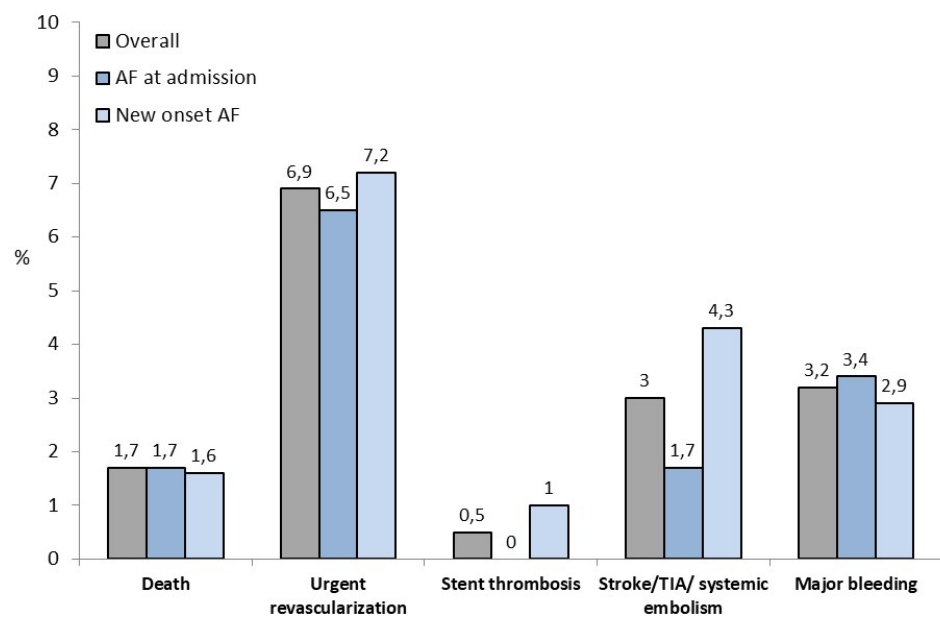

Figure 1

254x190mm (96 x 96 DPI)

FIGURE 2

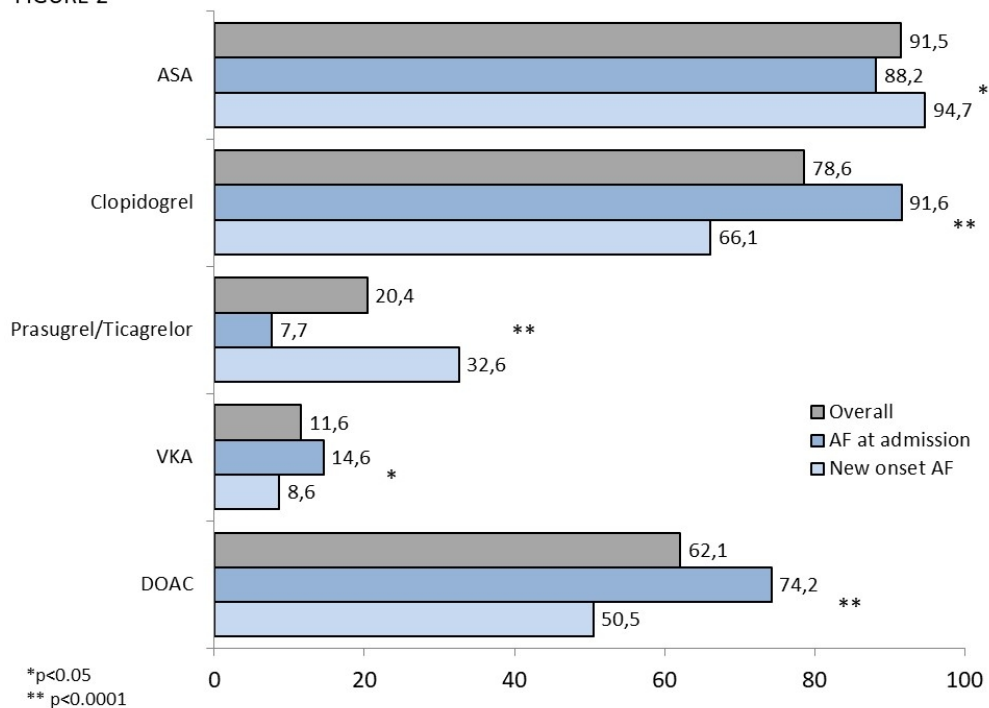

Figure 2

254x190mm (96 x 96 DPI)

1  
2  
3  
4  
5  
6  
7  
8  
9  
10  
11  
12  
13  
14  
15  
16  
17  
18  
19  
20  
21  
22  
23  
24  
25  
26  
27  
28  
29  
30  
31  
32  
33  
34  
35  
36  
37  
38  
39  
40  
41  
42  
43  
44  
45  
46  
47  
48  
49  
50  
51  
52  
53  
54  
55  
56  
57  
58  
59  
60

FIGURE 3

Patients with AF and ACS treated with coronary stents enrolled between August 2018 and December 2019 in 76 Italian cardiology centers

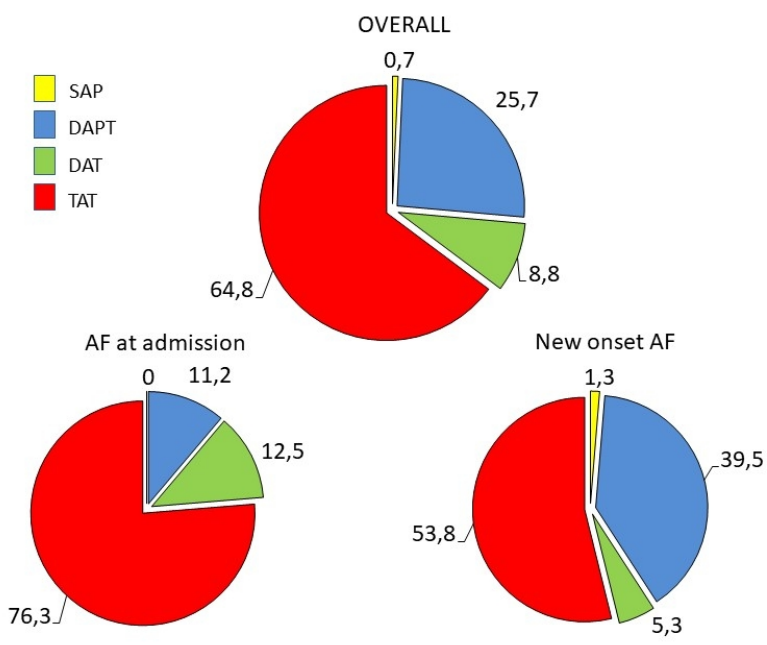

Figure 3

254x190mm (96 x 96 DPI)

FIGURE 4

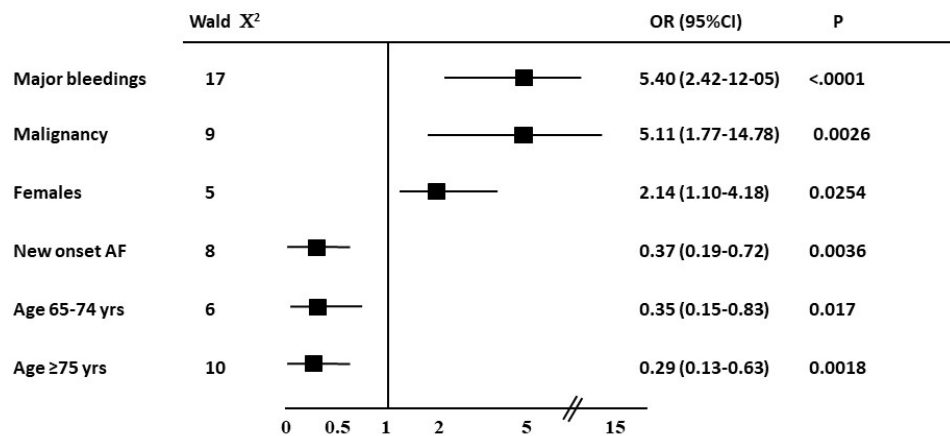

Figure 4

254x190mm (96 x 96 DPI)

# Reporting checklist for cross sectional study.

Based on the STROBE cross sectional guidelines.

## Instructions to authors

Complete this checklist by entering the page numbers from your manuscript where readers will find each of the items listed below.

Your article may not currently address all the items on the checklist. Please modify your text to include the missing information. If you are certain that an item does not apply, please write "n/a" and provide a short explanation.

Upload your completed checklist as an extra file when you submit to a journal.

In your methods section, say that you used the STROBE cross sectional reporting guidelines, and cite them as:

von Elm E, Altman DG, Egger M, Pocock SJ, Gotsche PC, Vandenbroucke JP. The Strengthening the Reporting of Observational Studies in Epidemiology (STROBE) Statement: guidelines for reporting observational studies.

|                           |                                                                                                        | Page   |
|---------------------------|--------------------------------------------------------------------------------------------------------|--------|
|                           | Reporting Item                                                                                         | Number |
| <b>Title and abstract</b> |                                                                                                        |        |
| Title                     | <a href="#">#1a</a> Indicate the study's design with a commonly used term in the title or the abstract | 1      |

|    |                      |                     |                                                                 |     |
|----|----------------------|---------------------|-----------------------------------------------------------------|-----|
| 1  | Abstract             | <a href="#">#1b</a> | Provide in the abstract an informative and balanced summary     | 2   |
| 2  |                      |                     |                                                                 |     |
| 3  |                      |                     | of what was done and what was found                             |     |
| 4  |                      |                     |                                                                 |     |
| 5  |                      |                     |                                                                 |     |
| 6  | <b>Introduction</b>  |                     |                                                                 |     |
| 7  |                      |                     |                                                                 |     |
| 8  |                      |                     |                                                                 |     |
| 9  |                      |                     |                                                                 |     |
| 10 | Background /         | <a href="#">#2</a>  | Explain the scientific background and rationale for the         | 4   |
| 11 | rationale            |                     | investigation being reported                                    |     |
| 12 |                      |                     |                                                                 |     |
| 13 |                      |                     |                                                                 |     |
| 14 |                      |                     |                                                                 |     |
| 15 | Objectives           | <a href="#">#3</a>  | State specific objectives, including any prespecified           | 4   |
| 16 |                      |                     | hypotheses                                                      |     |
| 17 |                      |                     |                                                                 |     |
| 18 |                      |                     |                                                                 |     |
| 19 |                      |                     |                                                                 |     |
| 20 | <b>Methods</b>       |                     |                                                                 |     |
| 21 |                      |                     |                                                                 |     |
| 22 |                      |                     |                                                                 |     |
| 23 | Study design         | <a href="#">#4</a>  | Present key elements of study design early in the paper         | 5   |
| 24 |                      |                     |                                                                 |     |
| 25 |                      |                     |                                                                 |     |
| 26 | Setting              | <a href="#">#5</a>  | Describe the setting, locations, and relevant dates, including  | 5   |
| 27 |                      |                     | periods of recruitment, exposure, follow-up, and data           |     |
| 28 |                      |                     | collection                                                      |     |
| 29 |                      |                     |                                                                 |     |
| 30 |                      |                     |                                                                 |     |
| 31 |                      |                     |                                                                 |     |
| 32 |                      |                     |                                                                 |     |
| 33 |                      |                     |                                                                 |     |
| 34 | Eligibility criteria | <a href="#">#6a</a> | Give the eligibility criteria, and the sources and methods of   | 5-6 |
| 35 |                      |                     | selection of participants.                                      |     |
| 36 |                      |                     |                                                                 |     |
| 37 |                      |                     |                                                                 |     |
| 38 |                      |                     |                                                                 |     |
| 39 |                      |                     |                                                                 |     |
| 40 |                      | <a href="#">#7</a>  | Clearly define all outcomes, exposures, predictors, potential   | 6   |
| 41 |                      |                     | confounders, and effect modifiers. Give diagnostic criteria, if |     |
| 42 |                      |                     | applicable                                                      |     |
| 43 |                      |                     |                                                                 |     |
| 44 |                      |                     |                                                                 |     |
| 45 |                      |                     |                                                                 |     |
| 46 |                      |                     |                                                                 |     |
| 47 | Data sources /       | <a href="#">#8</a>  | For each variable of interest give sources of data and details  | 6   |
| 48 | measurement          |                     | of methods of assessment (measurement). Describe                |     |
| 49 |                      |                     | comparability of assessment methods if there is more than       |     |
| 50 |                      |                     | one group. Give information separately for for exposed and      |     |
| 51 |                      |                     | unexposed groups if applicable.                                 |     |
| 52 |                      |                     |                                                                 |     |
| 53 |                      |                     |                                                                 |     |
| 54 |                      |                     |                                                                 |     |
| 55 |                      |                     |                                                                 |     |
| 56 |                      |                     |                                                                 |     |
| 57 |                      |                     |                                                                 |     |
| 58 |                      |                     |                                                                 |     |
| 59 |                      |                     |                                                                 |     |
| 60 |                      |                     |                                                                 |     |

|    |                |                      |                                                               |     |
|----|----------------|----------------------|---------------------------------------------------------------|-----|
| 1  | Bias           | <a href="#">#9</a>   | Describe any efforts to address potential sources of bias     | 6   |
| 2  |                |                      |                                                               |     |
| 3  |                |                      |                                                               |     |
| 4  | Study size     | <a href="#">#10</a>  | Explain how the study size was arrived at                     | 6   |
| 5  |                |                      |                                                               |     |
| 6  |                |                      |                                                               |     |
| 7  | Quantitative   | <a href="#">#11</a>  | Explain how quantitative variables were handled in the        | 6-7 |
| 8  | variables      |                      | analyses. If applicable, describe which groupings were        |     |
| 9  |                |                      | chosen, and why                                               |     |
| 10 |                |                      |                                                               |     |
| 11 |                |                      |                                                               |     |
| 12 |                |                      |                                                               |     |
| 13 |                |                      |                                                               |     |
| 14 |                |                      |                                                               |     |
| 15 | Statistical    | <a href="#">#12a</a> | Describe all statistical methods, including those used to     | 6-7 |
| 16 | methods        |                      | control for confounding                                       |     |
| 17 |                |                      |                                                               |     |
| 18 |                |                      |                                                               |     |
| 19 |                |                      |                                                               |     |
| 20 | Statistical    | <a href="#">#12b</a> | Describe any methods used to examine subgroups and            | 6-7 |
| 21 | methods        |                      | interactions                                                  |     |
| 22 |                |                      |                                                               |     |
| 23 |                |                      |                                                               |     |
| 24 |                |                      |                                                               |     |
| 25 |                |                      |                                                               |     |
| 26 | Statistical    | <a href="#">#12c</a> | Explain how missing data were addressed                       | 6-7 |
| 27 | methods        |                      |                                                               |     |
| 28 |                |                      |                                                               |     |
| 29 |                |                      |                                                               |     |
| 30 |                |                      |                                                               |     |
| 31 | Statistical    | <a href="#">#12d</a> | If applicable, describe analytical methods taking account of  | N/A |
| 32 | methods        |                      | sampling strategy                                             |     |
| 33 |                |                      |                                                               |     |
| 34 |                |                      |                                                               |     |
| 35 |                |                      |                                                               |     |
| 36 | Statistical    | <a href="#">#12e</a> | Describe any sensitivity analyses                             | N/A |
| 37 | methods        |                      |                                                               |     |
| 38 |                |                      |                                                               |     |
| 39 |                |                      |                                                               |     |
| 40 |                |                      |                                                               |     |
| 41 |                |                      |                                                               |     |
| 42 | <b>Results</b> |                      |                                                               |     |
| 43 |                |                      |                                                               |     |
| 44 |                |                      |                                                               |     |
| 45 | Participants   | <a href="#">#13a</a> | Report numbers of individuals at each stage of study—eg       | 8   |
| 46 |                |                      | numbers potentially eligible, examined for eligibility,       |     |
| 47 |                |                      | confirmed eligible, included in the study, completing follow- |     |
| 48 |                |                      | up, and analysed. Give information separately for for         |     |
| 49 |                |                      | exposed and unexposed groups if applicable.                   |     |
| 50 |                |                      |                                                               |     |
| 51 |                |                      |                                                               |     |
| 52 |                |                      |                                                               |     |
| 53 |                |                      |                                                               |     |
| 54 |                |                      |                                                               |     |
| 55 |                |                      |                                                               |     |
| 56 |                |                      |                                                               |     |
| 57 | Participants   | <a href="#">#13b</a> | Give reasons for non-participation at each stage              | n/a |
| 58 |                |                      |                                                               |     |
| 59 |                |                      |                                                               |     |
| 60 |                |                      |                                                               |     |

|    |                   |                      |                                                                   |     |
|----|-------------------|----------------------|-------------------------------------------------------------------|-----|
| 1  | Participants      | <a href="#">#13c</a> | Consider use of a flow diagram                                    | n/a |
| 2  |                   |                      |                                                                   |     |
| 3  |                   |                      |                                                                   |     |
| 4  | Descriptive data  | <a href="#">#14a</a> | Give characteristics of study participants (eg demographic,       | 8   |
| 5  |                   |                      | clinical, social) and information on exposures and potential      |     |
| 6  |                   |                      | confounders. Give information separately for exposed and          |     |
| 7  |                   |                      | unexposed groups if applicable.                                   |     |
| 8  |                   |                      |                                                                   |     |
| 9  |                   |                      |                                                                   |     |
| 10 |                   |                      |                                                                   |     |
| 11 |                   |                      |                                                                   |     |
| 12 |                   |                      |                                                                   |     |
| 13 |                   |                      |                                                                   |     |
| 14 | Descriptive data  | <a href="#">#14b</a> | Indicate number of participants with missing data for each        | 8-9 |
| 15 |                   |                      | variable of interest                                              |     |
| 16 |                   |                      |                                                                   |     |
| 17 |                   |                      |                                                                   |     |
| 18 |                   |                      |                                                                   |     |
| 19 | Outcome data      | <a href="#">#15</a>  | Report numbers of outcome events or summary measures.             | 9   |
| 20 |                   |                      | Give information separately for exposed and unexposed             |     |
| 21 |                   |                      | groups if applicable.                                             |     |
| 22 |                   |                      |                                                                   |     |
| 23 |                   |                      |                                                                   |     |
| 24 |                   |                      |                                                                   |     |
| 25 |                   |                      |                                                                   |     |
| 26 |                   |                      |                                                                   |     |
| 27 | Main results      | <a href="#">#16a</a> | Give unadjusted estimates and, if applicable, confounder-         | 9   |
| 28 |                   |                      | adjusted estimates and their precision (eg, 95% confidence        |     |
| 29 |                   |                      | interval). Make clear which confounders were adjusted for         |     |
| 30 |                   |                      | and why they were included                                        |     |
| 31 |                   |                      |                                                                   |     |
| 32 |                   |                      |                                                                   |     |
| 33 |                   |                      |                                                                   |     |
| 34 |                   |                      |                                                                   |     |
| 35 |                   |                      |                                                                   |     |
| 36 |                   |                      |                                                                   |     |
| 37 | Main results      | <a href="#">#16b</a> | Report category boundaries when continuous variables were         | 9   |
| 38 |                   |                      | categorized                                                       |     |
| 39 |                   |                      |                                                                   |     |
| 40 |                   |                      |                                                                   |     |
| 41 |                   |                      |                                                                   |     |
| 42 | Main results      | <a href="#">#16c</a> | If relevant, consider translating estimates of relative risk into | n/a |
| 43 |                   |                      | absolute risk for a meaningful time period                        |     |
| 44 |                   |                      |                                                                   |     |
| 45 |                   |                      |                                                                   |     |
| 46 |                   |                      |                                                                   |     |
| 47 |                   |                      |                                                                   |     |
| 48 | Other analyses    | <a href="#">#17</a>  | Report other analyses done—e.g., analyses of subgroups            | N/A |
| 49 |                   |                      | and interactions, and sensitivity analyses                        |     |
| 50 |                   |                      |                                                                   |     |
| 51 |                   |                      |                                                                   |     |
| 52 |                   |                      |                                                                   |     |
| 53 | <b>Discussion</b> |                      |                                                                   |     |
| 54 |                   |                      |                                                                   |     |
| 55 |                   |                      |                                                                   |     |
| 56 | Key results       | <a href="#">#18</a>  | Summarise key results with reference to study objectives          | 11  |
| 57 |                   |                      |                                                                   |     |
| 58 |                   |                      |                                                                   |     |
| 59 |                   |                      |                                                                   |     |
| 60 |                   |                      |                                                                   |     |



|    |                          |                     |                                                                |       |
|----|--------------------------|---------------------|----------------------------------------------------------------|-------|
| 1  | Limitations              | <a href="#">#19</a> | Discuss limitations of the study, taking into account sources  | 13    |
| 2  |                          |                     | of potential bias or imprecision. Discuss both direction and   |       |
| 3  |                          |                     | magnitude of any potential bias.                               |       |
| 4  |                          |                     |                                                                |       |
| 5  |                          |                     |                                                                |       |
| 6  |                          |                     |                                                                |       |
| 7  |                          |                     |                                                                |       |
| 8  |                          |                     |                                                                |       |
| 9  | Interpretation           | <a href="#">#20</a> | Give a cautious overall interpretation considering objectives, | 11-12 |
| 10 |                          |                     | limitations, multiplicity of analyses, results from similar    |       |
| 11 |                          |                     | studies, and other relevant evidence.                          |       |
| 12 |                          |                     |                                                                |       |
| 13 |                          |                     |                                                                |       |
| 14 |                          |                     |                                                                |       |
| 15 |                          |                     |                                                                |       |
| 16 | Generalisability         | <a href="#">#21</a> | Discuss the generalisability (external validity) of the study  | 11-12 |
| 17 |                          |                     | results.                                                       |       |
| 18 |                          |                     |                                                                |       |
| 19 |                          |                     |                                                                |       |
| 20 |                          |                     |                                                                |       |
| 21 |                          |                     |                                                                |       |
| 22 | <b>Other Information</b> |                     |                                                                |       |
| 23 |                          |                     |                                                                |       |
| 24 |                          |                     |                                                                |       |
| 25 | Funding                  | <a href="#">#22</a> | Give the source of funding and the role of the funders for the | 15    |
| 26 |                          |                     | present study and, if applicable, for the original study on    |       |
| 27 |                          |                     | which the present article is based                             |       |
| 28 |                          |                     |                                                                |       |
| 29 |                          |                     |                                                                |       |
| 30 |                          |                     |                                                                |       |
| 31 |                          |                     |                                                                |       |
| 32 |                          |                     |                                                                |       |

33 None The STROBE checklist is distributed under the terms of the Creative Commons Attribution  
34 License CC-BY. This checklist can be completed online using <https://www.goodreports.org/>, a tool  
35 made by the [EQUATOR Network](#) in collaboration with [Penelope.ai](#)  
36  
37  
38  
39  
40  
41  
42  
43  
44  
45  
46  
47  
48  
49  
50  
51  
52  
53  
54  
55  
56  
57  
58  
59  
60

# BMJ Open

## Antithrombotic management of patients with acute coronary syndromes and atrial fibrillation undergoing coronary stenting: a prospective, observational, nationwide study

|                                 |                                                                                                                                                                                                                                                                                                                                                                                                                                                                                                                                                                                                                                                                                                                                                                                                                                                                                                                                                                                                                                         |
|---------------------------------|-----------------------------------------------------------------------------------------------------------------------------------------------------------------------------------------------------------------------------------------------------------------------------------------------------------------------------------------------------------------------------------------------------------------------------------------------------------------------------------------------------------------------------------------------------------------------------------------------------------------------------------------------------------------------------------------------------------------------------------------------------------------------------------------------------------------------------------------------------------------------------------------------------------------------------------------------------------------------------------------------------------------------------------------|
| Journal:                        | <i>BMJ Open</i>                                                                                                                                                                                                                                                                                                                                                                                                                                                                                                                                                                                                                                                                                                                                                                                                                                                                                                                                                                                                                         |
| Manuscript ID                   | bmjopen-2020-041044.R1                                                                                                                                                                                                                                                                                                                                                                                                                                                                                                                                                                                                                                                                                                                                                                                                                                                                                                                                                                                                                  |
| Article Type:                   | Original research                                                                                                                                                                                                                                                                                                                                                                                                                                                                                                                                                                                                                                                                                                                                                                                                                                                                                                                                                                                                                       |
| Date Submitted by the Author:   | 27-Sep-2020                                                                                                                                                                                                                                                                                                                                                                                                                                                                                                                                                                                                                                                                                                                                                                                                                                                                                                                                                                                                                             |
| Complete List of Authors:       | De Luca, Leonardo; San Camillo Forlanini Hospital, Department of Cardiosciences<br>Rubboli, Andrea; Division of Cardiology, Ospedale S. Maria delle Croci, Ravenna<br>Bolognese, Leonardo; Department of Cardio-neuro-vascular Sciences, Ospedale S. Donato<br>Gonzini, Lucio; ANMCO<br>Urbinati, Stefano; Ospedale Bellaria Carlo Alberto Pizzardi, Cardiology<br>Murrone, Adriano; Division of Cardiology, Ospedale di Città di Castello<br>Scotto di Uccio, Fortunato; Division of Cardiology, Ospedale del Mare<br>Ferrari, Fabio; Division of Cardiology, A. O. S Luigi Gonzaga<br>Lucà, Fabiana; Division of Cardiology, Grande Ospedale Metropolitano, Azienda Bianchi Melacrino Morelli<br>Caldarola, Pasquale; Division of Cardiology, Ospedale S. Paolo<br>Lucci, Donata; ANMCO<br>Gabrielli, Domenico; Division of Cardiology, A. Murri Hospital<br>Di Lenarda, Andrea; Division of Cardiology, Azienda Sanitaria Universitaria Integrata di Trieste<br>Gulizia, Michele ; Division of Cardiology, Garibaldi-Nesima Hospital |
| <b>Primary Subject Heading</b>: | Cardiovascular medicine                                                                                                                                                                                                                                                                                                                                                                                                                                                                                                                                                                                                                                                                                                                                                                                                                                                                                                                                                                                                                 |
| Secondary Subject Heading:      | Cardiovascular medicine, Epidemiology, Pharmacology and therapeutics                                                                                                                                                                                                                                                                                                                                                                                                                                                                                                                                                                                                                                                                                                                                                                                                                                                                                                                                                                    |
| Keywords:                       | Adult cardiology < CARDIOLOGY, Coronary heart disease < CARDIOLOGY, Cardiac Epidemiology < CARDIOLOGY, Coronary intervention < CARDIOLOGY, Myocardial infarction < CARDIOLOGY                                                                                                                                                                                                                                                                                                                                                                                                                                                                                                                                                                                                                                                                                                                                                                                                                                                           |
|                                 |                                                                                                                                                                                                                                                                                                                                                                                                                                                                                                                                                                                                                                                                                                                                                                                                                                                                                                                                                                                                                                         |

SCHOLARONE™  
Manuscripts



I, the Submitting Author has the right to grant and does grant on behalf of all authors of the Work (as defined in the below author licence), an exclusive licence and/or a non-exclusive licence for contributions from authors who are: i) UK Crown employees; ii) where BMJ has agreed a CC-BY licence shall apply, and/or iii) in accordance with the terms applicable for US Federal Government officers or employees acting as part of their official duties; on a worldwide, perpetual, irrevocable, royalty-free basis to BMJ Publishing Group Ltd ("BMJ") its licensees and where the relevant Journal is co-owned by BMJ to the co-owners of the Journal, to publish the Work in this journal and any other BMJ products and to exploit all rights, as set out in our [licence](#).

The Submitting Author accepts and understands that any supply made under these terms is made by BMJ to the Submitting Author unless you are acting as an employee on behalf of your employer or a postgraduate student of an affiliated institution which is paying any applicable article publishing charge ("APC") for Open Access articles. Where the Submitting Author wishes to make the Work available on an Open Access basis (and intends to pay the relevant APC), the terms of reuse of such Open Access shall be governed by a Creative Commons licence – details of these licences and which [Creative Commons](#) licence will apply to this Work are set out in our licence referred to above.

Other than as permitted in any relevant BMJ Author's Self Archiving Policies, I confirm this Work has not been accepted for publication elsewhere, is not being considered for publication elsewhere and does not duplicate material already published. I confirm all authors consent to publication of this Work and authorise the granting of this licence.

1  
2  
3 **Antithrombotic management of patients with acute coronary syndromes and**  
4 **atrial fibrillation undergoing coronary stenting: a prospective, observational,**  
5 **nationwide study**  
6  
7  
8  
9

10  
11 Leonardo De Luca, MD, PhD, FACC, FESC<sup>1</sup>; Andrea Rubboli, MD, FESC<sup>2</sup>; Leonardo  
12 Bolognese, MD, FESC<sup>3</sup>; Lucio Gonzini, BSc<sup>4</sup>; Stefano Urbinati, MD, FESC<sup>5</sup>; Adriano  
13 Murrone, MD<sup>6</sup>; Fortunato Scotto di Uccio, MD<sup>7</sup>; Fabio Ferrari, MD<sup>8</sup>; Fabiana Lucà,  
14 MD<sup>9</sup>; Pasquale Caldarola, MD<sup>10</sup>; Donata Lucci, BSc<sup>4</sup>; Domenico Gabrielli, MD,  
15 FACC, FESC<sup>11</sup>; Andrea Di Lenarda, MD, FESC<sup>12</sup>; Michele Massimo Gulizia, MD,  
16 FACC, FESC<sup>13</sup>; on behalf of the MATADOR-PCI Investigators\*

17  
18  
19  
20  
21  
22  
23  
24  
25 <sup>1</sup>Division of Cardiology, A.O. San Camillo-Forlanini, Roma; <sup>2</sup>Division of Cardiology, Ospedale  
26 S. Maria delle Croci, Ravenna; <sup>3</sup>Department of Cardio-neuro-vascular Sciences, Ospedale S.  
27 Donato, Arezzo; <sup>4</sup>ANMCO Research Center, Firenze; <sup>5</sup>Division of Cardiology, Ospedale  
28 Bellaria, Bologna; <sup>6</sup>Division of Cardiology, Ospedale di Città di Castello (PG); <sup>7</sup>Division of  
29 Cardiology, Ospedale del Mare, Napoli; <sup>8</sup>Division of Cardiology, A. O. S Luigi Gonzaga,  
30 Orbassano (TO); <sup>9</sup>Division of Cardiology, Grande Ospedale Metropolitano, Azienda Bianchi  
31 Melacrino Morelli, Reggio Calabria; <sup>10</sup>Division of Cardiology, Ospedale S. Paolo, Bari;  
32 <sup>11</sup>Division of Cardiology, A. Murri Hospital, Fermo; <sup>12</sup>Division of Cardiology, Azienda Sanitaria  
33 Universitaria Integrata di Trieste; <sup>13</sup>Division of Cardiology, Garibaldi-Nesima Hospital, Catania,  
34 Italy.  
35  
36  
37  
38

39 \*See Appendix for a complete list of centres and Investigators

40  
41 Running title: MATADOR-PCI Study

42  
43 Clinical Trial Registration. URL: <http://www.clinicaltrials.gov>. Unique identifier:  
44 NCT03656523.  
45

46  
47 Word count: 4616; 44 references, 2 Tables, 4 Figures  
48  
49

50  
51 **Corresponding author:**

52  
53 Leonardo De Luca, MD, PhD, FACC, FESC  
54 Department of Cardiosciences, Division of Cardiology,  
55 Azienda Ospedaliera San Camillo Forlanini  
56 Circonvallazione Gianicolense, 87, 00152 Roma, Italy  
57 Email: [leo.deluca@libero.it](mailto:leo.deluca@libero.it); Phone: +39- 06-58704419; Fax +39-06-5870 4361  
58 Centro Studi ANMCO, Via Alfonso La Marmora, 34 - 50121 Firenze, Italy  
59 [centrostudi@anmco.it](mailto:centrostudi@anmco.it); Tel +39 055/5101361, fax +39 055/5101310  
60

## ABSTRACT

**Objective.** The aim of the study was to assess current management of patients with atrial fibrillation (AF) and acute coronary syndromes (ACS) undergoing coronary stenting.

**Design.** Non-interventional, prospective, nationwide study.

**Setting.** 76 private or public cardiology centers in Italy.

**Participants.** ACS patients with concomitant AF undergoing percutaneous coronary intervention (PCI).

**Primary and secondary outcome measures.** To obtain accurate and up-to-date information on pharmacological management of patients with AF admitted for an ACS and undergoing PCI with stent implantation.

**Results.** Over a 12-month period, 598 consecutive patients were enrolled: 48.8% with AF at hospital admission and 51.2% developing AF during hospitalization. At discharge, a triple antithrombotic therapy (TAT) was prescribed in 64.8%, dual antiplatelet therapy (DAPT) in 25.7%, and dual antithrombotic therapy (DAT) in 8.8% of patients. Among patients with AF at admission, TAT and DAT were more frequently prescribed compared to new onset AF patients (76.3% vs 53.8% and 12.5% vs 5.3%, respectively; both  $p < 0.0001$ ), while a DAPT was less often used (11.2% vs 39.5%;  $p < 0.0001$ ). At multivariable analysis, a major bleeding event [odds ratio (OR): 5.40; 95% confidence intervals (CI): 2.42-12.05;  $p < 0.0001$ ] and malignancy (OR: 5.11; 95% CI: 1.77-14.78;  $p = 0.003$ ) resulted the most important independent predictors of DAT prescription.

**Conclusions.** In this contemporary registry of ACS patients with AF treated with coronary stents, TAT still resulted as the antithrombotic strategy of choice, DAT was reserved for high bleeding risk and DAPT was mainly prescribed in those developing AF during hospitalization.

**Key words:** acute coronary syndromes; atrial fibrillation; percutaneous coronary intervention; stents; direct oral anticoagulants; treatment.

### Strengths and limitations of this study

- Prospective, nationwide observational study
- Contemporary community-based registry evaluating the antithrombotic management of patients with ACS and AF undergoing PCI
- Data limited to the hospitalization period

For peer review only

## INTRODUCTION

Approximately 10% of patients with acute coronary syndromes (ACS) requiring percutaneous coronary intervention (PCI) with stent implantation presents a concomitant atrial fibrillation (AF) (1-11). Such patients theoretically need oral anticoagulation (OAC) and dual antiplatelet therapy (DAPT), a combination known as triple antithrombotic therapy (TAT), in order to decrease both the risk of thromboembolism due to AF and the risk of thrombosis and recurrent ischemic events due to ACS and coronary stents (1-7).

Unsurprisingly, TAT is associated with a high rate of major and fatal bleeding events (12). Recently, several randomized trials demonstrated the favorable safety profile of a double antithrombotic therapy (DAT), which combines OAC with a P2Y12 receptor inhibitor, as compared to TAT (13-17).

After the validation of these novel antithrombotic strategies and the dissemination of direct oral anticoagulants (DOACs) in clinical practice, no nationwide or community-based data describing contemporary pharmacological management of patients with AF and ACS treated with PCI are available. In this regard, the Italian National Association of Hospital Cardiologist (ANMCO) designed the MATADOR-PCI (Management of Antithrombotic TherApy in Patients with Chronic or DevelOping AtRial Fibrillation During Hospitalization for PCI) study, aimed to obtain accurate and up-to-date information concerning management and outcome of patients with AF admitted in cardiology intensive care units (CCUs) for an ACS undergoing PCI with stent implantation.

## METHODS

The MATADOR-PCI was a prospective, observational, nationwide registry of consecutive patients with a confirmed diagnosis of ACS treated with PCI and concomitant AF conducted in Italy during a 1-year period.

All consecutive ACS patients [non-ST elevation-ACS (NSTEMI) or ST-elevation myocardial infarction (STEMI)] undergoing PCI and with AF at the time of hospital admission, either paroxysmal, persistent or permanent, or developing during the index hospitalization were included. Patients admitted with a diagnosis of ACS at the time of enrolment but not confirmed during hospitalization, ACS treated medically, with surgical revascularization or with percutaneous coronary balloon angioplasty without stent implantation, and those not giving informed consent were excluded from the survey.

ANMCO invited to participate in this study all Italian cardiology centers with a CCU and a catheterization laboratory performing at least 400 PCI per year (medium-high volume according to Italian standards), including university teaching hospitals, general and regional hospitals, and private clinics. No specific protocols or recommendations for evaluation, management, and/or treatment have been put forth during this observational study. However, current guidelines for the management of patients with AF, myocardial revascularization and ACS have been discussed during the investigator meetings.

### Data collection and data quality

Data on demographics, cardiovascular and non-cardiovascular medical history, previous interventional procedures, type of ACS, type of AF, the timing of AF onset (if AF occurred during hospitalization), in-hospital management, pharmacological treatment, timing of PCI, severity and extension of coronary artery disease, number and type of stent, laboratory values, ECG characteristics, hemodynamic parameters, and in-hospital major clinical events were collected.

Myocardial infarction was defined according to the third universal definition of MI (18). Stroke was identified as an acute neurologic deficit lasting >24 hours and affecting the ability to perform



1  
2  
3 daily activities with or without confirmation by imaging techniques. Stent thrombosis was defined  
4  
5 according to the Academic Research Consortium (ARC) recommendations (19). Bleeding events  
6  
7 were defined according to the Bleeding Academic Research Consortium (BARC) criteria (20). A  
8  
9 major bleeding was defined as BARC  $\geq 3$ .  
10

11  
12 At each site, the principal investigator was responsible for screening eligible consecutive patients.  
13  
14 Data were collected using a web-based, electronic CRF with the central database located at the  
15  
16 ANMCO Research Center. By using a validation plan, integrated in the data entry software, data  
17  
18 were checked for missing or contradictory entries and values out of the normal range.  
19  
20  
21  
22

### 23 **Patient consent and ethical approval**

24  
25 All patients were informed of the nature and aims of the study and asked to sign an informed  
26  
27 consent for the anonymous management of their individual data. Local Institutional Review  
28  
29 Boards (IRB) approved the study protocol according to the current Italian rules. The IRB of  
30  
31 the coordinator center (A.O. San Camillo -Forlanini) approved the study on January 24<sup>th</sup>,  
32  
33 2018 (reference number: 151/CS).  
34  
35

36 The study was conducted in accordance with the Declaration of Helsinki, the Good Clinical  
37  
38 Practice guidelines and the applicable local legislations of non-interventional studies. The  
39  
40 MATADOR-PCI study is registered at ClinicalTrials.gov (NCT03656523).  
41  
42  
43  
44

### 45 **Statistical analysis**

46  
47 Considering the explorative and observational nature of the study, no formal sample size  
48  
49 calculation has been performed. However, considering the number of ACS patients with AF  
50  
51 at the time of hospital admission or developing AF during the index hospitalization enrolled  
52  
53 in previous snapshots performed in Italy and endorsed by ANMCO in the last 15 years (21),  
54  
55 it was estimated to include approximately 500 patients (8% of ACS patients undergoing PCI  
56  
57 in 1 year in about 100 centers) to allow for a representative national cohort in terms of  
58  
59 geographical distribution and well balanced in terms of complexity (e.g. PCI volume,  
60

1  
2  
3 cardiac surgery).

4  
5 Normally distributed variables were expressed as mean  $\pm$  standard deviation (SD), and  
6  
7 compared using the Student t test, whereas non-normally distributed variables as median and  
8  
9 interquartile range (IQR) and compared with the Mann-Whitney U test. Categorical  
10  
11 variables were reported as numbers and percentages and compared using the chi-squared test  
12  
13 or Fisher exact tests, as appropriate.  
14  
15

16 The study cohort was stratified according to the two pre-specified groups of patients: (1)  
17  
18 those with AF at the time of hospital admission and (2) those developing AF after hospital  
19  
20 admission for an ACS.  
21  
22

23 Clinically relevant variables which were significant at univariate analysis were included in a  
24  
25 multivariable model (logistic regression) in order to identify the independent predictors of  
26  
27 DAT and TAT prescription at discharge, compared to other antithrombotic strategies. The  
28  
29 variables included in the logistic model for DAT were: age (<65 reference group, 65-74,  $\geq$ 75  
30  
31 years), gender, onset of AF (at admission vs during hospitalization), type of ACS (STEMI vs  
32  
33 NSTEMI-ACS), diabetes mellitus, malignancy, major bleeding (history or occurred during  
34  
35 hospitalization). Variables included in the logistic model for TAT were the following: age  
36  
37 (<65 reference group, 65-74,  $\geq$ 75 years), gender, onset of AF (at admission vs during  
38  
39 hospitalization), type of ACS (STEMI vs NSTEMI-ACS), : hypertension, history of HF,  
40  
41 previous revascularization, prior AMI, stroke/TIA, malignancy, major bleeding (history or  
42  
43 occurred during hospitalization). When more than two categories were present, dummy  
44  
45 variables were introduced to define a reference group.  
46  
47

48 A p value < 0.05 was considered statistically significant. All tests were 2-sided. Analyses  
49  
50 were performed with SAS system software, version 9.4.  
51  
52  
53  
54  
55  
56  
57  
58  
59  
60

## RESULTS

Each site started patient enrollment after local IRB approval. Therefore, data were collected in different periods of consecutive 12 months in each site between August 2018 and December 2019. The study has been carried out in 76 cardiology centers [68 (89.5%) with a 24 hours/7 days primary PCI service and 19 (25.0%) with also a cardiac surgery onsite], well representing the Italian cardiology reality in terms of geographical distribution and level of hospital technology. Five-hundred-ninety-eight consecutive patients have been enrolled: 292 (48.8%) with AF at hospital admission and 306 (51.2%) developing AF during the index hospitalization. Among this latter group, 131 (42.8%) developed AF before and 175 (57.2%) after PCI; the median time from admission to AF onset was 18.0 (IQR 1.0-49.0) hours. Among the 211 patients with AF at admission and a history of AF, 116 (55.0%) had a permanent AF.

Baseline characteristics of the study population are shown in Table 1. The mean age of enrolled patients was  $73\pm 10$  years, 70% were male, 33% diabetics and 26% had prior coronary revascularization. Patients with AF at admission presented more frequently a diagnosis of NSTEMI-ACS and were older, with a higher incidence of prior episodes of AF and major risk factors compared to patients developing AF during hospitalization (Table 1). The mean CHA<sub>2</sub>DS<sub>2</sub>-VASc was  $3.7\pm 1.6$  and  $2.9\pm 1.7$  ( $p<0.0001$ ), while the HAS-BLEED was  $2.6\pm 1.1$  and  $2.1\pm 1.1$  ( $p<0.0001$ ), in patients with AF at admission or developing AF during the hospitalization, respectively.

At the time of admission, 178 (29.8%) were receiving acetylsalicylic acid (ASA), 32 (5.4%) a DAPT and 210 (35%) an OAC (this latter more frequently used in patients with AF at admission compared to the other group) (Table 1).

### Antithrombotic therapy in the peri-procedural period

A pretreatment with DAPT was employed in 345 (57.8%) patients, without differences between the two groups. Among the 210 patients on chronic OAC, it was interrupted before

1  
2  
3 PCI in 163 (77.6%).  
4

5 Table 2 shows the angiographic and procedural variables of enrolled patients. A radial  
6 approach was used in 86%, a multivessel disease was present in 51%, and a drug-eluting  
7 stent (DES) was implanted in 98% of patients. A complete revascularization was obtained in  
8  
9  
10  
11  
12 70% of cases.  
13  
14  
15

### 16 **In-hospital clinical events**

17  
18 The median duration of hospitalization in cardiology wards was 8 [IQR 5-12] days (7 [IQR  
19 5-9] vs 9 [IQR 6-13] days for patients with AF at admission or new onset AF, respectively;  
20  
21  $p < 0.0001$ ). Ten (1.7%) patients died during the hospitalization (5 with AF at admission and  
22  
23 5 with new onset AF). Among the remaining 588 (98.3%) patients discharged alive, a sinus  
24  
25 rhythm was present in 362 (61.6%) [106 (36.9%) with AF at admission and 256 (85.1%)  
26  
27 new onset AF;  $p < 0.0001$ ]. In patients with new onset AF, the median duration of the  
28  
29 arrhythmia was 4 (IQR 1.0-26.0) hours and an electrical cardioversion was performed in 28  
30  
31 (9.2%).  
32  
33  
34

35  
36 In-hospital clinical events are shown in Figure 1. An urgent revascularization occurred in  
37  
38 6.9%, a thromboembolic or major bleeding event in 3% and a definite stent thrombosis in  
39  
40 0.5% of cases, without differences between the two groups.  
41  
42  
43  
44

### 45 **Antithrombotic therapies at discharge**

46  
47 The single antithrombotic compounds prescribed at discharge are shown in Figure 2.  
48  
49 A DAPT was prescribed in 26%, TAT in 65% and DAT in 9% of patients (Figure 3).  
50  
51 Among patients with AF at admission, TAT and DAT were more frequently prescribed  
52  
53 compared to new onset AF patients (76.3% vs 53.8% and 12.5% vs 5.3%, respectively; both  
54  
55  $p < 0.0001$ ), while a DAPT was less often used (11.2% vs 39.5%;  $p < 0.0001$ ) (Figure 3).  
56  
57 DOACs were largely used in both patients receiving TAT (84.3%) and DAT (84.6%).  
58  
59 At multivariable analysis, a major bleeding event [odds ratio (OR): 5.40; 95% confidence  
60

1  
2  
3 intervals (CI): 2.42-12.05;  $p < 0.0001$ ] and malignancy (OR: 5.11; 95% CI: 1.77-14.78;  
4  
5  $p = 0.003$ ) resulted the most important independent predictors of DAT prescription (Figure 4).  
6  
7 The independent predictors of TAT prescription derived from multivariable analysis are  
8  
9 shown in supplementary Table 1.  
10  
11  
12  
13  
14  
15  
16  
17  
18  
19  
20  
21  
22  
23  
24  
25  
26  
27  
28  
29  
30  
31  
32  
33  
34  
35  
36  
37  
38  
39  
40  
41  
42  
43  
44  
45  
46  
47  
48  
49  
50  
51  
52  
53  
54  
55  
56  
57  
58  
59  
60

For peer review only

## DISCUSSION

The major findings of this nationwide, contemporary, prospective registry of unselected ACS patients with concomitant AF undergoing PCI are the following: 1. AF at admission is associated with a high incidence of major risk factors while new onset AF more frequently develops after STEMI; 2. TAT is still the antithrombotic strategy of choice in AF patients undergoing PCI, especially in those with AF at admission, while DAT is reserved for patients deemed at high bleeding risk; 3. A quarter of patients did not receive any OAC and approximately 40% of patients with new onset AF has been discharged on DAPT.

It is estimated that one out of ten ACS patients requiring PCI with stent implantation may present AF prior to or occurring during the index hospitalization (1-3). In this latter group, the relative risk of developing AF is usually highest at the onset of ischemia, it diminishes over time and is higher in those with greater clinical severity of ACS (22), as confirmed by our data. Despite its relatively frequent occurrence and the many etiologic factors involved in its pathogenetic condition, the short- or long-term prognostic significance of new-onset AF complicating ACS remains unclear (22-25). In our series of ACS patients treated with contemporary PCI strategies, as documented by the very high rates of transradial approach and DES implanted, new onset AF patients presented a slightly higher, not significant, rate of in-hospital ischemic events as compared to those with AF at admission. This finding can be related to the more frequent presence of STEMI and haemodynamic instability among patients developing AF during the index hospitalization. Indeed, new-onset atrial fibrillation occurs more frequently in critically unwell patients and its incidence increases with greater severity of illness (26,27).

The pharmacological management of patients with AF undergoing PCI requires a careful balance of the risk of thromboembolic and atherothrombotic events against the increased chance of bleeding, since most AF patients are likely to receive TAT for the prevention of stroke, stent thrombosis or recurrent cardiac events (28). In recent years, several randomized controlled trials including an overall population of more than 10,000 patients, assessed the

1  
2  
3 safety of replacing TAT with DAT in AF patients treated with PCI (15-18,28). Meta-  
4 analyses of these trials showed that DAT is associated with reduced risk for major bleeding  
5 compared with TAT, regardless of several features including clinical risk profile and PCI  
6 complexity (29,30). However, low-certainty evidence showed inconclusive effects of DAT  
7 versus TAT on risks for mortality, stroke and stent thrombosis (29,30).  
8  
9

10  
11 The recent 2019 ACC/AHA/HRS guidelines for AF (31) recommended DAT with DOACs as an  
12 alternative to TAT to reduce bleeding, while, in the ESC guidelines released in 2016 (1), this  
13 indication was restricted to patients at baseline high bleeding risk. Based on the North American  
14 expert consensus document (7), the default approach was DAT, and short-term TAT could be  
15 considered in patients who have high thrombotic risk and low bleeding risk. Accordingly, recent  
16 2020 ESC guidelines on the management of AF recommend early cessation ( $\leq 1$  week) of aspirin  
17 and continuation of DAT for up to 12 months in AF patients with ACS undergoing an  
18 uncomplicated PCI if the risk of stent thrombosis is low or if concerns about bleeding risk prevail  
19 over concerns about risk of stent thrombosis (32). This appears in accordance with the recent  
20 observation of an increased early stent thrombosis with DAT as compared to TAT with DOAC  
21 (33) supporting an initial course of TAT in all ACS patients with AF (34,35). Our data suggest  
22 that, although DOACs nearly replaced vitamin K antagonists, TAT is still largely used in  
23 contemporary clinical practice. These findings may be related to 2016 ESC guidelines  
24 recommendations (1) that were available during the conduction of our registry and did not  
25 consider all the evidence coming from recent trials, to the lack of hospital protocols updating or to  
26 the issues in changing therapeutic habits, as confirmed by previous nationwide surveys conducted  
27 in Europe before the availability of newer evidence in this field (36,37). All these data emphasize  
28 the need for educational campaigns in order to translate recent evidence and guidelines  
29 recommendation into clinical practice.  
30  
31

32  
33 The antithrombotic strategy is particularly challenging in patients who develop AF during an  
34 ACS episode, especially those with paroxysmal episodes of AF (22,38). Indeed, although it  
35  
36  
37  
38  
39  
40  
41  
42  
43  
44  
45  
46  
47  
48  
49  
50  
51  
52  
53  
54  
55  
56  
57  
58  
59  
60

1  
2  
3 is unclear whether new onset AF associated with ACS has the same thromboembolic risk as  
4  
5 a prior history of AF, substantial risk of AF recurrence following acute ischemia exists in  
6  
7 these subjects (22). In this regard, a consensus document by the European Heart Rhythm  
8  
9 Association (6) suggests that OAC should be generally prescribed in new onset AF,  
10  
11 according to the individual risk of stroke, in combination with antiplatelet agents. In our  
12  
13 registry, a quarter of the overall cohort was treated with DAPT and 40% of patients  
14  
15 developing AF during hospitalization was discharged without any OAC prescription,  
16  
17 probably because the AF episode has been considered a transient epiphenomenon triggered  
18  
19 by the acute myocardial ischemia. The high prescription of DAPT and the concomitant low  
20  
21 use of OAT could justify the greater prescription of potent oral P2Y12 inhibitors observed in  
22  
23 our cohort of patients with new onset AF compared to those with AF at admission. The low  
24  
25 utilization of OAC in this population is consistent with large retrospective analyses of  
26  
27 critically ill patients with sepsis (39,40) and a Swedish registry (41) and other retrospective  
28  
29 studies (42-44) on ACS. In a recent analysis of 149 patients developing AF during  
30  
31 hospitalization for ACS and treated by PCI, DAT was strongly associated with mortality at  
32  
33 long-term follow-up, suggesting that an intensified antithrombotic regimen should be  
34  
35 considered also in this high-risk patient population (44). Studies specific to new-onset AF  
36  
37 following ACS are needed in order to better identify those requiring anticoagulation and its  
38  
39 optimal duration.  
40  
41  
42  
43  
44  
45

### 46 **Study Limitations**

47  
48 Our study must be evaluated in the light of the known limitations of observational, cross-sectional  
49  
50 studies. In addition, the data reported in the present analysis are limited to the time of  
51  
52 hospitalization. However, a clinical follow-up at 6 months from enrolment is ongoing and will  
53  
54 assess clinical outcomes and the adherence to prescribed antithrombotic strategy. Finally, even  
55  
56 though the participating centers were asked to include in the registry all consecutive ACS patients  
57  
58 with AF requiring coronary stents, we were not able to verify the enrolment process due to the  
59  
60



1  
2  
3 absence of administrative auditing. However, based on the number of AF patients enrolled in  
4  
5 previous nationwide registry of ACS, we believe that the rate of patients enrolled is reliable and it  
6  
7 is unlikely that a selective enrolment in a few sites may have substantially changed the study  
8  
9 results.  
10  
11  
12  
13

## 14 **CONCLUSIONS**

15  
16 This nationwide registry provides unique insights into the current antithrombotic  
17  
18 management of patients with ACS and concomitant AF undergoing coronary stenting.  
19  
20 Although recent evidence showed the safety of DAT in this population, our data  
21  
22 demonstrate that TAT is still largely prescribed while DAT is reserved for patients deemed  
23  
24 at high bleeding risk. At discharge, an OAC was not prescribed in 25% of the overall  
25  
26 population and in 40% of patients developing AF during hospitalization.  
27  
28  
29  
30  
31  
32  
33  
34  
35  
36  
37  
38  
39  
40  
41  
42  
43  
44  
45  
46  
47  
48  
49  
50  
51  
52  
53  
54  
55  
56  
57  
58  
59  
60

### **Author contribution**

The Steering Committee designed the study. All authors participated in the conduct of the study and contributed to the interpretation of the results. LDL, DG, ADL and MMG drafted, planned and conducted the manuscript. LG and DL analyzed the data. AR, LB, SU, AM, FSU, FF, FL and PC read, revised and approved the final version of the article. The corresponding author attests that all listed authors meet the authorship criteria and that no others meeting the criteria have been omitted.

### **Data availability statement**

Data are available upon reasonable request to ANMCO Research Center, Florence, Italy.

### **Funding**

The sponsor of the study was the Heart Care Foundation, a non-profit independent organization, which also owns the database. Database management, quality control of the data and data analyses were under the responsibility of the ANMCO Research Centre of the Heart Care Foundation. The study was partially supported by an unrestricted grant by Boehringer Ingelheim, Pharma GmbH & CoKG. No compensations were provided to participating sites, investigators, nor members of the Steering Committee. The Steering Committee of the study had full access to all the data in this study and takes complete responsibility for the integrity of the data and the accuracy of the data analysis.

### **Conflicts of interest**

Dr. De Luca has received speakers honoraria from Bayer, Boehringer Ingelheim, Daiichi Sankyo, Pfizer/BMS outside the submitted work; All other authors have reported that no potential conflicts of interest exist with any companies/organizations whose products or

1  
2  
3 services may be discussed in this article. Gonzini and Lucci are employees of Heart Care  
4  
5 Foundation, which conducted the study with an unrestricted grant of research from  
6  
7 Boehringer Ingelheim, Pharma GmbH & CoKG.  
8  
9  
10  
11  
12

### 13 **Patient and Public Involvement**

14  
15  
16 Patients and/or the public were not involved in the design, or conduct, or reporting, or  
17  
18 dissemination plans of this research.  
19  
20  
21  
22  
23  
24  
25  
26  
27  
28  
29  
30  
31  
32  
33  
34  
35  
36  
37  
38  
39  
40  
41  
42  
43  
44  
45  
46  
47  
48  
49  
50  
51  
52  
53  
54  
55  
56  
57  
58  
59  
60

## REFERENCES

1. Kirchhof P, Benussi S, Kotecha D, et al. 2016 ESC Guidelines for the management of atrial fibrillation developed in collaboration with EACTS. *Eur Heart J* 2016;37:2893-2962.
1. Lip GYH, Collet J, Haude M, et al. 2018 Joint European consensus document on the management of antithrombotic therapy in atrial fibrillation patients presenting with acute coronary syndrome and/or undergoing percutaneous cardiovascular interventions: a joint consensus document of the European Heart Rhythm Association (EHRA), European Society of Cardiology Working Group on Thrombosis, European Association of Percutaneous Cardiovascular Interventions (EAPCI), and European Association of Acute Cardiac Care (ACCA) endorsed by the Heart Rhythm Society (HRS), Asia-Pacific Heart Rhythm Society (APHRS), Latin America Heart Rhythm Society (LAHRS), and Cardiac Arrhythmia Society of Southern Africa (CASSA). *Europace* 2019;21:192–193
2. Smith SC Jr., Feldman TE, Hirshfeld JW Jr., et al. ACC/AHA/SCAI 2005 guideline update for percutaneous coronary intervention—summary article: a report of the American College of Cardiology/American Heart Association Task Force on Practice Guidelines (ACC/AHA/SCAI Writing Committee to Update the 2001 Guidelines for Percutaneous Coronary Intervention). *J Am Coll Cardiol* 2006;47:216–35.
3. Nieuwlaat R, Capucci A, Camm AJ, et al., for the European Heart Survey Investigators. Atrial fibrillation management: a prospective survey in ESC member countries: the Euro Heart Survey on Atrial Fibrillation. *Eur Heart J* 2005;26:2422–34.
4. Valgimigli M, Bueno H, Byrne RA, et al. 2017 ESC focused update on dual antiplatelet therapy in coronary artery disease developed in collaboration with EACTS. *Eur Heart J* 2018;39:213-260.

- 1  
2  
3 5. Steffel J, Verhamme P, Potpara TS, et al. The 2018 European Heart Rhythm  
4 Association practical guide on the use of non-vitamin K antagonist oral anticoagulants  
5 in patients with atrial fibrillation *Eur Heart J* 2018;39:1330-1393.  
6  
7
- 8  
9  
10 6. Angiolillo DJ, Goodman SG, Bhatt DL, et al. Antithrombotic therapy in  
11 patients with atrial fibrillation treated with oral anticoagulation undergoing  
12 percutaneous coronary intervention: a North American perspective—2018 update.  
13 *Circulation* 2018;138:527-536  
14  
15
- 16  
17 7. Goldberg RJ, Yarzebski J, Lessard D, et al. Recent trends in the incidence rates  
18 of and death rates from atrial fibrillation complicating initial acute myocardial  
19 infarction: a community-wide perspective. *Am Heart J* 2002;143:519–527.  
20  
21
- 22  
23 8. Wong CK, White HD, Wilcox RG, et al. New atrial fibrillation after acute  
24 myocardial infarction independently predicts death: the GUSTO-III experience. *Am*  
25 *Heart J* 2000;140:878–885.  
26  
27
- 28  
29 1. Wong CK, White HD, Wilcox RG, et al. Significance of atrial fibrillation  
30 during acute myocardial infarction, and its current management: insights from the  
31 GUSTO-3 trial. *Card Electrophysiol Rev* 2003;7:201–207.  
32  
33
- 34  
35 1. McManus DD, Huang W, Domakonda KV, et al. Trends in Atrial Fibrillation in  
36 Patients Hospitalized with an Acute Coronary Syndrome. *Am J Med* 2012;125:1076–  
37 1084.  
38  
39
- 40  
41 2. van Rein N, Heide-Jørgensen U, Lijfering WM, Dekkers OM, Sørensen HT,  
42 Cannegieter SC. Major bleeding rates in atrial fibrillation patients on single, dual, or  
43 triple antithrombotic therapy. *Circulation* 2019;139:775-786.  
44  
45
- 46  
47 1. Dewilde WJ, Oirbans T, Verheugt FW, et al. Use of clopidogrel with or  
48 without aspirin in patients taking oral anticoagulant therapy and undergoing  
49 percutaneous coronary intervention: an open-label, randomised, controlled trial.  
50 *Lancet* 2013;381:1107-1115.  
51  
52  
53  
54  
55  
56  
57  
58  
59  
60

- 1  
2  
3 2. Gibson CM, Mehran R, Bode C, et al. Prevention of bleeding in patients with  
4 atrial fibrillation undergoing PCI *N Engl J Med* 2016;375:2423-2434.  
5  
6
- 7 3. Cannon CP, Bhatt DL, Oldgren J, et al. Dual Antithrombotic therapy with  
8 dabigatran after PCI in atrial fibrillation. *N Engl J Med* 2017;377:1513-1524.  
9  
10
- 11 4. Lopes RD, Heizer G, Aronson R, et al. Antithrombotic therapy after acute  
12 coronary syndrome or PCI in atrial fibrillation. *N Engl J Med* 2019;380:1509-1524.  
13  
14
- 15 5. Vranckx P, Valgimigli M, Eckardt L, et al. Edoxaban-based versus vitamin K  
16 antagonist-based antithrombotic regimen after successful coronary stenting in patients  
17 with atrial fibrillation (ENTRUST-AF PCI): a randomised, open-label, phase 3b trial.  
18 *Lancet* 2019;394:1335-1343.  
19  
20
- 21 6. Thygesen K, Alpert JS, Jaffe AS, Simoons ML, Chaitman BR, White HD;  
22 Joint ESC/ACCF/AHA/WHF Task Force for Universal Definition of Myocardial  
23 Infarction. Third universal definition of myocardial infarction. *J Am Coll Cardiol*  
24 2012;60:1581-98.  
25  
26
- 27 7. Cutlip DE, Windecker S, Mehran R, et al.; Academic Research Consortium.  
28 Clinical end points in coronary stent trials: a case for standardized definitions.  
29 *Circulation* 2007;115:2344–2351.  
30  
31
- 32 8. Mehran R, Rao SV, Bhatt DL, et al. Standardized bleeding definitions for  
33 cardiovascular clinical trials: A consensus report from the Bleeding Academic  
34 Research Consortium. *Circulation* 2011;123:2736-2747.  
35  
36
- 37 9. De Luca L, Casella G, Rubboli A, et al. Recent trends in management and  
38 outcome of patients with acute coronary syndromes and atrial fibrillation. *Int J Cardiol*  
39 2017;248:369-375.  
40  
41
- 42 10. Lau DH, Alasady M, Brooks AG, Sanders P. New-onset atrial fibrillation and  
43 acute coronary syndrome. *Expert Rev Cardiovasc Ther* 2010;8:941-8.  
44  
45  
46  
47  
48  
49  
50  
51  
52  
53  
54  
55  
56  
57  
58  
59  
60

11. Wong CK, White HD, Wilcox RG, et al. New atrial fibrillation after acute myocardial infarction independently predicts death: the GUSTO-III experience. *Am Heart J* 2000;140:878–885.
12. Pizzetti F, Turazza FM, Franzosi MG, et al.; GISSI-3 Investigators. Incidence and prognostic significance of atrial fibrillation in acute myocardial infarction: the GISSI-3 data. *Heart* 2001;86:527-32.
13. Zeymer U, Annemans L, Danchin N, et al. Impact of known or new-onset atrial fibrillation on 2-year cardiovascular event rate in patients with acute coronary syndromes: results from the prospective EPICOR Registry. *Eur Heart J Acute Cardiovasc Care* 2018; doi:10.1177/2048872618769057.
1. Yoshida T, Fujii T, Uchino S, et al. Epidemiology, prevention, and treatment of new-onset atrial fibrillation in critically ill: a systematic review. *J Intensive Care* 2015;3:19.
2. O'Bryan LJ, Redfern OC, Bedford J, et al. Managing new-onset atrial fibrillation in critically ill patients: a systematic narrative review. *BMJ Open* 2020;10:e034774.
3. Capodanno D, Huber K, Mehran R, et al. Management of Antithrombotic Therapy in Atrial Fibrillation Patients Undergoing PCI. *Daivide J Am Coll Cardiol* 2019;74:83–99.
1. Khan SU, Osman M, Khan MU, et al. Dual Versus Triple Therapy for Atrial Fibrillation After Percutaneous Coronary Intervention: A Systematic Review and Meta-analysis *Ann Intern Med* 2020 Mar 17. Online ahead of print
4. Lopes RD, Hong H, Harskamp RE, et al. Optimal Antithrombotic Regimens for Patients With Atrial Fibrillation Undergoing Percutaneous Coronary Intervention: An Updated Network Meta-analysis. *JAMA Cardiol* 2020 Feb. Online ahead of print.

- 1  
2  
3 5. January CT, Wann LS, Calkins H, et al. 2019 AHA/ACC/HRS Focused Update  
4  
5 of the 2014 AHA/ACC/HRS Guideline for the Management of Patients With Atrial  
6  
7 Fibrillation: A Report of the American College of Cardiology/American Heart  
8  
9 Association Task Force on Clinical Practice Guidelines and the Heart Rhythm Society.  
10  
11 J Am Coll Cardiol 2019;74:104-132.  
12  
13  
14
- 15 6. Hindricks G, Potpara T, Dagres N, et al. 2020 ESC Guidelines for the diagnosis and  
16  
17 management of atrial fibrillation developed in collaboration with the European Association of  
18  
19 Cardio-Thoracic Surgery (EACTS). Eur Heart J 2020, in press doi: 10.1093/eurheartj/ehaa612.  
20  
21
- 22 7. Gargiulo G, Goette A, Tijssen J, et al. Safety and efficacy outcomes of double  
23  
24 vs. triple antithrombotic therapy in patients with atrial fibrillation following  
25  
26 percutaneous coronary intervention: a systematic review and meta-analysis of non-  
27  
28 vitamin K antagonist oral anticoagulant-based randomized clinical trials. Eur Heart J  
29  
30 2019;40:3757-3767.  
31  
32  
33
- 34 8. Alexander JH, Wojdyla D, Vora AN, et al. The Risk / Benefit Tradeoff of Antithrombotic  
35  
36 Therapy in Patients with Atrial Fibrillation Early and Late After an Acute Coronary Syndrome  
37  
38 or Percutaneous Coronary Intervention: Insights from AUGUSTUS. Circulation 2020. Online  
39  
40 ahead of print.  
41  
42
- 43 9. Rubboli A, Lip GYH. Algorithm for the management of antithrombotic therapy  
44  
45 in atrial fibrillation patients undergoing percutaneous coronary intervention: an updated  
46  
47 proposal based on efficacy considerations. Eur Heart J Cardiovasc Pharmacother.  
48  
49 2020, in press doi: 10.1093/ehjcvp/pvaa003.  
50  
51
- 52 10. Lamberts M, Gislason GH, Olesen JB, et al. Oral anticoagulation and  
53  
54 antiplatelets in atrial fibrillation patients after myocardial infarction and coronary  
55  
56 intervention. J Am Coll Cardiol 2013;62:981-9.  
57  
58  
59  
60



- 1  
2  
3 11. Lane DA, Dagues N, Dan G, et al. Antithrombotic treatment in patients with  
4 atrial fibrillation and acute coronary syndromes: results of the European Heart Rhythm  
5 Association survey. *Europace* 2019;21:1116–1125.  
6  
7
- 8  
9  
10 12. Rubboli A, Agewall S, Huber K, Lip GYH. New-onset atrial fibrillation after  
11 percutaneous coronary intervention with stent: updated proposal of an algorithm for  
12 the choice of oral anticoagulant and its dose. *Eur J Intern Med* 2017;40:e11–12.  
13  
14
- 15  
16  
17 13. Walkey AJ, Quinn EK, Winter MR, et al. Practice patterns and outcomes  
18 associated with use of anticoagulation among patients with atrial fibrillation during  
19 sepsis. *JAMA Cardiol* 2016;1:682–90.  
20  
21
- 22  
23  
24 14. Quon MJ, Behloul H, Pilote L. Anticoagulant use and risk of ischemic stroke  
25 and bleeding in patients with secondary atrial fibrillation associated with acute  
26 coronary syndromes, acute pulmonary disease, or sepsis. *JACC Clin Electrophysiol*  
27  
28  
29  
30 2018;4:386–93.  
31
- 32  
33  
34 15. Stenestrand U, Lindback J, Wallentin L. Anticoagulation therapy in atrial  
35 fibrillation in combination with acute myocardial infarction influences long-term  
36 outcome: a prospective cohort study from the Register of Information and Knowledge  
37 About Swedish Heart Intensive Care Admissions (RIKS-HIA). *Circulation*  
38  
39  
40 2005;112:3225-3231.  
41
- 42  
43  
44 16. Mehta RH, Dabbous OH, Granger CB, et al. Comparison of outcomes of  
45 patients with acute coronary syndromes with and without atrial fibrillation. *Am J*  
46  
47  
48  
49  
50  
51  
52  
53  
54  
55  
56  
57  
58  
59  
60  
60  
Cardiol 2003;92:1031-1036.
17. Lau DH, Huynh LT, Chew DP, et al. Prognostic impact of types of atrial  
fibrillation in acute coronary syndromes. *Am J Cardiol* 2009;104:1317-1323.
18. Hofer F, Kazem N, Hammer A, et al. Long-Term Prognosis of De-Novo Atrial  
Fibrillation during Acute Myocardial Infarction – The Impact of Anti-Thrombotic

1  
2  
3 Treatment Strategies. Eur Heart J Cardiovasc Pharmacother 2020, in press  
4

5 <https://doi.org/10.1093/ehjcvp/pvaa027>  
6  
7  
8  
9  
10  
11  
12  
13  
14  
15  
16  
17  
18  
19  
20  
21  
22  
23  
24  
25  
26  
27  
28  
29  
30  
31  
32  
33  
34  
35  
36  
37  
38  
39  
40  
41  
42  
43  
44  
45  
46  
47  
48  
49  
50  
51  
52  
53  
54  
55  
56  
57  
58  
59  
60

For peer review only

1  
2  
3 **FIGURE LEGENDS**  
4  
5

6 **Figure 1.** In-hospital clinical events  
7

8 **Figure 2.** Antithrombotic therapies prescribed at discharge  
9

10 **Figure 3 (Central illustration).** Combination of antithrombotic therapies prescribed at discharge.  
11

12  
13 DAPT: dual antiplatelet therapy; DAT: dual antithrombotic therapy; SAPT: single  
14  
15 antiplatelet therapy; TAT: triple antithrombotic therapy  
16

17 **Figure 4.** Independent predictors of DAT prescription at multivariable analysis  
18  
19  
20  
21  
22  
23  
24  
25  
26  
27  
28  
29  
30  
31  
32  
33  
34  
35  
36  
37  
38  
39  
40  
41  
42  
43  
44  
45  
46  
47  
48  
49  
50  
51  
52  
53  
54  
55  
56  
57  
58  
59  
60

**Table 1.** Clinical characteristics, hemodynamic variables, laboratory parameters and antithrombotic therapy at baseline

|                                                 | <b>Overall<br/>(n=598)</b> | <b>AF at<br/>admission<br/>(n=292)</b> | <b>New onset<br/>AF<br/>(n=306)</b> | <b>P<br/>value</b> |
|-------------------------------------------------|----------------------------|----------------------------------------|-------------------------------------|--------------------|
| Age, yrs (mean±SD)                              | 73±10                      | 76±10                                  | 72±10                               | <0.000<br>1        |
| Males, n (%)                                    | 417 (69.7)                 | 203 (69.5)                             | 214 (69.9)                          | 0.91               |
| Body mass index, Kg/m <sup>2</sup><br>(mean±SD) | 27.3±4.3                   | 27.2±4.2                               | 27.3±4.5                            | 0.92               |
| Final diagnosis, n (%)                          |                            |                                        |                                     | <0.000<br>1        |
| STEMI                                           | 273 (45.7)                 | 101 (34.6)                             | 172 (56.2)                          |                    |
| NSTEMI-ACS                                      | 325 (54.3)                 | 191 (65.4)                             | 134 (43.8)                          |                    |
| <i>Clinical history and risk factors, n (%)</i> |                            |                                        |                                     |                    |
| Prior episodes of AF                            | 253 (42.3)                 | 211 (72.3)                             | 42 (13.7)                           | <0.000<br>1        |
| Active smokers                                  | 119 (19.9)                 | 46 (15.8)                              | 73 (23.9)                           | 0.01               |
| Diabetes mellitus                               | 198 (33.1)                 | 109 (37.3)                             | 89 (29.1)                           | 0.03               |
| Hypertension                                    | 467 (78.1)                 | 245 (83.9)                             | 222 (72.6)                          | 0.0008             |
| Hypercholesterolemia                            | 310 (51.8)                 | 155 (53.1)                             | 155 (50.7)                          | 0.55               |
| Peripheral artery disease                       | 51 (8.5)                   | 33 (11.3)                              | 18 (5.9)                            | 0.02               |
| Previous stroke/TIA                             | 66 (11.0)                  | 43 (14.7)                              | 23 (7.5)                            | 0.005              |
| History of angina                               | 177 (29.6)                 | 114 (39.0)                             | 63 (20.6)                           | <0.000<br>1        |
| History of heart failure                        | 72 (12.0)                  | 51 (17.5)                              | 21 (6.9)                            | <0.000<br>1        |
| Previous MI                                     | 135 (22.6)                 | 82 (28.1)                              | 53 (17.3)                           | 0.002              |
| Prior PCI                                       | 143 (23.9)                 | 87 (29.8)                              | 56 (18.3)                           | 0.001              |
| Prior CABG                                      | 28 (4.7)                   | 21 (7.2)                               | 7 (2.3)                             | 0.005              |
| History of major bleeding                       | 16 (2.7)                   | 11 (3.8)                               | 5 (1.6)                             | 0.11               |
| Chronic kidney disease                          | 121 (20.2)                 | 82 (28.1)                              | 39 (12.8)                           | <0.000<br>1        |
| COPD                                            | 79 (13.2)                  | 43 (14.7)                              | 36 (11.8)                           | 0.29               |
| Cancer                                          | 23 (3.9)                   | 15 (5.1)                               | 8 (2.6)                             | 0.11               |
| <i>Haemodynamic variables</i>                   |                            |                                        |                                     |                    |
| Killip III-IV, n (%)                            | 76 (12.7)                  | 27 (9.3)                               | 49 (16.0)                           | 0.13               |
| Electrical instability, n (%)                   | 55 (9.2)                   | 14 (4.8)                               | 41 (13.4)                           | 0.0003             |

|                                           |              |              |              |         |
|-------------------------------------------|--------------|--------------|--------------|---------|
| SBP, mmHg (mean±SD)                       | 132±26       | 132±25       | 132±27       | 0.85    |
| HR, bpm (mean±SD)                         | 87±26        | 88±28        | 86±25        | 0.22    |
| Ejection fraction, % (mean±SD)            | 46.8±10.4    | 47.0±10.3    | 46.5±10.4    | 0.56    |
| <i>Laboratory parameters</i>              |              |              |              |         |
| Hemoglobin, g/dL, (mean±SD)               | 13.3±1.9     | 13.2±1.9     | 13.4±1.9     | 0.12    |
| Creatinine, mg/dL, (mean±SD)              | 1.2±1.0      | 1.2±0.8      | 1.2±1.1      | 0.03    |
| LDL Cholesterol, mg/dL, (mean±SD)         | 104±38       | 100±36       | 107±40       | 0.05    |
| Tryglicerides, mg/dL, (median [IQR])      | 104 [78-144] | 104 [78-148] | 105 [77-140] | 0.84    |
| Platelets, 10 <sup>5</sup> /mL, (mean±SD) | 223±82       | 211±76       | 235±86       | 0.0003  |
| INR, (mean±SD)                            | 1.3±0.6      | 1.4±0.7      | 1.1±0.2      | <0.0001 |
| <i>Antithrombotic therapy, n (%)</i>      |              |              |              |         |
| ASA only                                  | 146 (24.4)   | 66 (22.6)    | 80 (26.1)    | 0.31    |
| P2Y12 inhibitors only                     | 21 (3.5)     | 11 (3.8)     | 10 (3.3)     | 0.74    |
| DAPT                                      | 32 (5.4)     | 14 (4.8)     | 18 (5.9)     | 0.55    |
| LMWH                                      | 15 (2.5)     | 7 (2.4)      | 8 (2.6)      | 0.87    |
| VKA                                       | 73 (12.2)    | 65 (22.3)    | 8 (2.6)      | <0.0001 |
| DOAC                                      | 137 (22.9)   | 119 (40.8)   | 18 (5.9)     | <0.0001 |

Abbreviations: AF: atrial fibrillation; ASA: acetylsalicylic acid; CABG: coronary artery bypass grafting; COPD: chronic obstructive pulmonary disease; DAPT: dual antiplatelet therapy; DOAC: direct oral anticoagulants; HR: heart rate; INR: international normalized ratio; LDL: low density lipoprotein; LMWH: low-molecular weight heparins; MI: myocardial infarction; NSTEMI: Non-ST elevation acute coronary syndromes; PCI: percutaneous coronary intervention; SBP: systolic blood pressure; STEMI: St-elevation myocardial infarction; TIA: transient ischemic attack; VKA: vitamin-K antagonists

**Table 2.** Angiographic and procedural variables and antithrombotic therapies administered in the cath lab.

|                                                                     | <b>Overall<br/>(n=598)</b> | <b>AF at<br/>admission<br/>(n=292)</b> | <b>New onset<br/>AF<br/>(n=306)</b> | <b>P<br/>value</b> |
|---------------------------------------------------------------------|----------------------------|----------------------------------------|-------------------------------------|--------------------|
| Radial approach, n (%)                                              | 517 (86.5)                 | 260 (89.0)                             | 257 (84.0)                          | 0.07               |
| Multivessel disease, n (%)                                          | 306 (51.2)                 | 140 (48.0)                             | 166 (54.3)                          | 0.12               |
| Basal TIMI 0/1, n (%)                                               | 226 (38.1)                 | 88 (30.1)                              | 138 (45.1)                          | <0.001             |
| Site of PCI, n (%)                                                  |                            |                                        |                                     |                    |
| Left main                                                           | 44 (7.4)                   | 19 (6.5)                               | 25 (8.2)                            | 0.44               |
| Left anterior descending                                            | 326 (54.5)                 | 155 (53.1)                             | 171 (55.9)                          | 0.49               |
| Circumflex                                                          | 176 (29.4)                 | 82 (28.1)                              | 94 (30.7)                           | 0.48               |
| Right coronary artery                                               | 229 (38.3)                 | 116 (39.7)                             | 113 (36.9)                          | 0.48               |
| Arterial/venous graft                                               | 9 (1.5)                    | 7 (2.4)                                | 2 (0.7)                             | 0.08               |
| Type of stent, n (%)                                                |                            |                                        |                                     |                    |
| BMS                                                                 | 15 (2.5)                   | 9 (3.1)                                | 6 (2.0)                             | 0.38               |
| DES, durable polymer                                                | 363 (60.7)                 | 162 (55.5)                             | 201 (65.7)                          | 0.01               |
| DES, biodegradable polymer                                          | 163 (27.3)                 | 90 (30.8)                              | 73 (23.9)                           | 0.06               |
| DES, polymer-free                                                   | 78 (13.0)                  | 47 (16.1)                              | 31 (10.1)                           | 0.03               |
| >2 stents implanted, n (%)                                          | 115 (19.2)                 | 53 (18.2)                              | 62 (20.3)                           | 0.51               |
| Complete revascularization, n (%)                                   | 421 (70.4)                 | 206 (70.6)                             | 215 (70.3)                          | 0.94               |
| <i>Antithrombotic therapies administered in the cath lab, n (%)</i> |                            |                                        |                                     |                    |
| ASA                                                                 | 31 (5.2)                   | 20 (6.9)                               | 11 (3.6)                            | 0.07               |
| DAPT                                                                | 101 (16.9)                 | 63 (21.6)                              | 38 (12.4)                           | 0.003              |
| GP IIb/IIIa inhibitors                                              | 69 (11.5)                  | 14 (4.8)                               | 55 (18.0)                           | <0.000<br>1        |
| Cangrelor                                                           | 9 (1.5)                    | 5 (1.4)                                | 5 (1.6)                             | 0.23               |
| Unfractionated heparin                                              | 333 (55.7)                 | 187 (64.0)                             | 146 (47.7)                          | <0.000<br>1        |

Abbreviations: ASA: acetylsalicylic acid; BMS: bare metal stent; DAPT: dual antiplatelet therapy; DES: drug-eluting stent; GP IIb/IIIa; glycoprotein IIb/IIIa receptor inhibitors; PCI: percutaneous coronary intervention.

1  
2  
3  
4  
5  
6  
7  
8  
9  
10  
11  
12  
13  
14  
15  
16  
17  
18  
19  
20  
21  
22  
23  
24  
25  
26  
27  
28  
29  
30  
31  
32  
33  
34  
35  
36  
37  
38  
39  
40  
41  
42  
43  
44  
45  
46  
47  
48  
49  
50  
51  
52  
53  
54  
55  
56  
57  
58  
59  
60

For peer review only

1  
2  
3 Group Names  
4

5 ANMCO: Associazione Nazionale Medici Cardiologi Ospedalieri  
6  
7  
8  
9  
10  
11  
12  
13  
14  
15  
16  
17  
18  
19  
20  
21  
22  
23  
24  
25  
26  
27  
28  
29  
30  
31  
32  
33  
34  
35  
36  
37  
38  
39  
40  
41  
42  
43  
44  
45  
46  
47  
48  
49  
50  
51  
52  
53  
54  
55  
56  
57  
58  
59  
60

For peer review only



1  
2  
3  
4  
5  
6  
7  
8  
9  
10  
11  
12  
13  
14  
15  
16  
17  
18  
19  
20  
21  
22  
23  
24  
25  
26  
27  
28  
29  
30  
31  
32  
33  
34  
35  
36  
37  
38  
39  
40  
41  
42  
43  
44  
45  
46  
47  
48  
49  
50  
51  
52  
53  
54  
55  
56  
57  
58  
59  
60

FIGURE 1



Figure 1

254x190mm (96 x 96 DPI)

FIGURE 2



Figure 2

254x190mm (96 x 96 DPI)

1  
2  
3  
4  
5  
6  
7  
8  
9  
10  
11  
12  
13  
14  
15  
16  
17  
18  
19  
20  
21  
22  
23  
24  
25  
26  
27  
28  
29  
30  
31  
32  
33  
34  
35  
36  
37  
38  
39  
40  
41  
42  
43  
44  
45  
46  
47  
48  
49  
50  
51  
52  
53  
54  
55  
56  
57  
58  
59  
60

FIGURE 3

Patients with AF and ACS treated with coronary stents enrolled between August 2018 and December 2019 in 76 Italian cardiology centers



Figure 3

254x190mm (96 x 96 DPI)

FIGURE 4



Figure 4

254x190mm (96 x 96 DPI)

## APPENDIX

### Steering Committee

L De Luca (Chairman), A Di Lenarda (co-chairman), MM Gulizia (co-chairman), A Rubboli (co-chairman), L Bolognese, D Gabrielli, A Murrone, F Scotto Di Uccio, S Urbinati

### Coordinating Center

ANMCO Research Center (AP Maggioni, A Lorimer, D Lucci, L Cipressa, G Orsini, L Gonzini)

### Participating Centers and Investigators

Tivoli (A Granatelli, A Posteraro, AM Conti); Orbassano (F Ferrari, M Bianco, MG Perrelli); Reggio Calabria Grande Osp. Metropol. (F Lucà, F Ciancia, S Lanteri); Bari Osp. S. Paolo (P Caldarola, N Locuratolo, D Rutigliano); Caserta AO S. Anna e S. Sebastiano (A Vetrano, A Fusco); Lecce Osp. Vito Fazzi (M Callerame, T Mazzella); Conegliano (L Rivetti, M Centa); Reggio Emilia AUSL RE (A Navazio, M Ferri) Legnano (F Poletti, M Mariani); Pavia Policlinico S. Matteo (S Leonardi, F Fortuni); Palermo PO Cervello (A Ledda, G Geraci) Milano Osp. S. Luca - Istituto Auxologico (S Blengino, V Vaccaro); Milano Centro Cardiologico Monzino (J Campodonico, N Cosentino); Rivoli (I Meynet, MF Lococo); Torino Osp. S. Giovanni Bosco (S Brach Prever, E Petitti); Udine POU S. M. della Misericordia (S Poli, C Lutman); Pesaro (S Maffei, L Scappini); Potenza AO San Carlo (CP La Creta, G Paternò); Roma Osp. S. Spirito (E Olivieri, A Chiera); Catania AO Cannizzaro (F Amico, S Giubilato); Ragusa (A Nicosia, E Puzangara); Savona (M Botta, M Ghione); Genova EO Ospedali Galliera (P Bernabò); Peschiera del Garda Casa di Cura Dr. Pederzoli (A Vicentini; O Spadaro); Rovereto (F Imperadore, G Musuraca); S. M. Capua Vetere (P Iodice, B Bosco); Terni AO S. Maria (P Mezzetti, M De Paolis); Avezzano (L Paraggio, M Santoro); Benevento (M Scherillo, D Formigli); Cefalù Fondazione G. Giglio (P Bonaccorso, M Giovino); Forlì (L Caravita, E Conficoni); Lido di Camaiore (G Casolo, A Lilli); Tricase (M Accogli, S Longo); Napoli Osp. del Mare (B Tuccillo, L Irace); Rho (G De Angelis, S Benincasa); Sassuolo (M Scapinelli, M Camellini); Bari Policlinico (M Pepe, D Zanna); Foggia Osp. Riuniti (ND Brunetti, A Ruggiero); Milano PO San Carlo (A Mafriaci, EMP Madonini); Roma Policlinico Umberto I (R Quaglione, FG Biccirè); Torino Osp. Maria Vittoria (M Giammaria, L Coda); Treviglio (PC Sganzerla, A Cardile); Aversa (L Fattore); Belluno (L Mario); Cagliari AO Brotzu (M Porcu); Gravedona (G Giacomarra); Imola (M Li Calzi); San Donà di Piave (C Canali); Andria (M Cannone); Avellino AORN S. Giuseppe Moscati (E Di Lorenzo); Bologna Osp. Maggiore (A Pecoraro); Desio (N Mollichelli); Eboli (G Bottiglieri); Foligno (M Scarpignato); Magenta (A Martinoni); Merate (S Maggiolini); Milano PO San Paolo (C Sponzilli); Napoli AORN Cardarelli (C Mauro); Roma Osp. S. Camillo (RL Putini); Roma Osp. Sant'Andrea (C Autore); San Severo (A Villella); Varese Osp. di Circolo e Fond. Macchi (A Limido); Brindisi (G Ignone); Castel Volturno (L Argenziano); Milano Osp. Metropolitan Niguarda (F Oliva); Nola (L Caliendo); Pistoia (M Comeglio); Pordenone (E Loiudice); Trento Osp. S. Chiara (R Bonmassari); Viterbo (L Sommariva); Bari Osp. di Venere (M Turturo); Firenze Osp. S. Giovanni di Dio (L Nicolaci); Mirano (S Saccà); Nuoro (G Casu); Pescia (P Giordano); Roma PO S. Filippo Neri (F Colivicchi).

**TABLE 1 SUPPL.** Independent predictors of TAT prescription at discharge.

| Variable                   | Odds Ratio | 95% Confidence Intervals | P value |
|----------------------------|------------|--------------------------|---------|
| Age 65-74 vs <65 years     | 2.87       | 1.69-4.87                | 0.0003  |
| Age $\geq$ 75 vs <65 years | 2.32       | 1.40-3.82                | 0.0003  |
| New onset AF               | 0.42       | 0.29-0.63                | <0.0001 |
| Malignancy                 | 0.31       | 0.12-0.81                | 0.002   |
| Bleeding events            | 0.21       | 0.10-0.43                | <0.0001 |

For peer review only

# Reporting checklist for cross sectional study.

Based on the STROBE cross sectional guidelines.

## Instructions to authors

Complete this checklist by entering the page numbers from your manuscript where readers will find each of the items listed below.

Your article may not currently address all the items on the checklist. Please modify your text to include the missing information. If you are certain that an item does not apply, please write "n/a" and provide a short explanation.

Upload your completed checklist as an extra file when you submit to a journal.

In your methods section, say that you used the STROBE cross sectional reporting guidelines, and cite them as:

von Elm E, Altman DG, Egger M, Pocock SJ, Gotsche PC, Vandenbroucke JP. The Strengthening the Reporting of Observational Studies in Epidemiology (STROBE) Statement: guidelines for reporting observational studies.

|                           |                                                                                                        | Page   |
|---------------------------|--------------------------------------------------------------------------------------------------------|--------|
|                           | Reporting Item                                                                                         | Number |
| <b>Title and abstract</b> |                                                                                                        |        |
| Title                     | <a href="#">#1a</a> Indicate the study's design with a commonly used term in the title or the abstract | 1      |

|    |                      |                     |                                                                 |     |
|----|----------------------|---------------------|-----------------------------------------------------------------|-----|
| 1  | Abstract             | <a href="#">#1b</a> | Provide in the abstract an informative and balanced summary     | 2   |
| 2  |                      |                     | of what was done and what was found                             |     |
| 3  |                      |                     |                                                                 |     |
| 4  |                      |                     |                                                                 |     |
| 5  |                      |                     |                                                                 |     |
| 6  | <b>Introduction</b>  |                     |                                                                 |     |
| 7  |                      |                     |                                                                 |     |
| 8  |                      |                     |                                                                 |     |
| 9  |                      |                     |                                                                 |     |
| 10 | Background /         | <a href="#">#2</a>  | Explain the scientific background and rationale for the         | 4   |
| 11 | rationale            |                     | investigation being reported                                    |     |
| 12 |                      |                     |                                                                 |     |
| 13 |                      |                     |                                                                 |     |
| 14 |                      |                     |                                                                 |     |
| 15 | Objectives           | <a href="#">#3</a>  | State specific objectives, including any prespecified           | 4   |
| 16 |                      |                     | hypotheses                                                      |     |
| 17 |                      |                     |                                                                 |     |
| 18 |                      |                     |                                                                 |     |
| 19 |                      |                     |                                                                 |     |
| 20 | <b>Methods</b>       |                     |                                                                 |     |
| 21 |                      |                     |                                                                 |     |
| 22 |                      |                     |                                                                 |     |
| 23 | Study design         | <a href="#">#4</a>  | Present key elements of study design early in the paper         | 5   |
| 24 |                      |                     |                                                                 |     |
| 25 |                      |                     |                                                                 |     |
| 26 | Setting              | <a href="#">#5</a>  | Describe the setting, locations, and relevant dates, including  | 5   |
| 27 |                      |                     | periods of recruitment, exposure, follow-up, and data           |     |
| 28 |                      |                     | collection                                                      |     |
| 29 |                      |                     |                                                                 |     |
| 30 |                      |                     |                                                                 |     |
| 31 |                      |                     |                                                                 |     |
| 32 |                      |                     |                                                                 |     |
| 33 |                      |                     |                                                                 |     |
| 34 | Eligibility criteria | <a href="#">#6a</a> | Give the eligibility criteria, and the sources and methods of   | 5-6 |
| 35 |                      |                     | selection of participants.                                      |     |
| 36 |                      |                     |                                                                 |     |
| 37 |                      |                     |                                                                 |     |
| 38 |                      |                     |                                                                 |     |
| 39 |                      |                     |                                                                 |     |
| 40 |                      | <a href="#">#7</a>  | Clearly define all outcomes, exposures, predictors, potential   | 6   |
| 41 |                      |                     | confounders, and effect modifiers. Give diagnostic criteria, if |     |
| 42 |                      |                     | applicable                                                      |     |
| 43 |                      |                     |                                                                 |     |
| 44 |                      |                     |                                                                 |     |
| 45 |                      |                     |                                                                 |     |
| 46 |                      |                     |                                                                 |     |
| 47 | Data sources /       | <a href="#">#8</a>  | For each variable of interest give sources of data and details  | 6   |
| 48 | measurement          |                     | of methods of assessment (measurement). Describe                |     |
| 49 |                      |                     | comparability of assessment methods if there is more than       |     |
| 50 |                      |                     | one group. Give information separately for for exposed and      |     |
| 51 |                      |                     | unexposed groups if applicable.                                 |     |
| 52 |                      |                     |                                                                 |     |
| 53 |                      |                     |                                                                 |     |
| 54 |                      |                     |                                                                 |     |
| 55 |                      |                     |                                                                 |     |
| 56 |                      |                     |                                                                 |     |
| 57 |                      |                     |                                                                 |     |
| 58 |                      |                     |                                                                 |     |
| 59 |                      |                     |                                                                 |     |
| 60 |                      |                     |                                                                 |     |



|    |                |                      |                                                               |     |
|----|----------------|----------------------|---------------------------------------------------------------|-----|
| 1  | Bias           | <a href="#">#9</a>   | Describe any efforts to address potential sources of bias     | 6   |
| 2  |                |                      |                                                               |     |
| 3  |                |                      |                                                               |     |
| 4  | Study size     | <a href="#">#10</a>  | Explain how the study size was arrived at                     | 6   |
| 5  |                |                      |                                                               |     |
| 6  |                |                      |                                                               |     |
| 7  | Quantitative   | <a href="#">#11</a>  | Explain how quantitative variables were handled in the        | 6-7 |
| 8  | variables      |                      | analyses. If applicable, describe which groupings were        |     |
| 9  |                |                      | chosen, and why                                               |     |
| 10 |                |                      |                                                               |     |
| 11 |                |                      |                                                               |     |
| 12 |                |                      |                                                               |     |
| 13 |                |                      |                                                               |     |
| 14 |                |                      |                                                               |     |
| 15 | Statistical    | <a href="#">#12a</a> | Describe all statistical methods, including those used to     | 6-7 |
| 16 | methods        |                      | control for confounding                                       |     |
| 17 |                |                      |                                                               |     |
| 18 |                |                      |                                                               |     |
| 19 |                |                      |                                                               |     |
| 20 | Statistical    | <a href="#">#12b</a> | Describe any methods used to examine subgroups and            | 6-7 |
| 21 | methods        |                      | interactions                                                  |     |
| 22 |                |                      |                                                               |     |
| 23 |                |                      |                                                               |     |
| 24 |                |                      |                                                               |     |
| 25 |                |                      |                                                               |     |
| 26 | Statistical    | <a href="#">#12c</a> | Explain how missing data were addressed                       | 6-7 |
| 27 | methods        |                      |                                                               |     |
| 28 |                |                      |                                                               |     |
| 29 |                |                      |                                                               |     |
| 30 |                |                      |                                                               |     |
| 31 | Statistical    | <a href="#">#12d</a> | If applicable, describe analytical methods taking account of  | N/A |
| 32 | methods        |                      | sampling strategy                                             |     |
| 33 |                |                      |                                                               |     |
| 34 |                |                      |                                                               |     |
| 35 |                |                      |                                                               |     |
| 36 | Statistical    | <a href="#">#12e</a> | Describe any sensitivity analyses                             | N/A |
| 37 | methods        |                      |                                                               |     |
| 38 |                |                      |                                                               |     |
| 39 |                |                      |                                                               |     |
| 40 |                |                      |                                                               |     |
| 41 |                |                      |                                                               |     |
| 42 | <b>Results</b> |                      |                                                               |     |
| 43 |                |                      |                                                               |     |
| 44 |                |                      |                                                               |     |
| 45 | Participants   | <a href="#">#13a</a> | Report numbers of individuals at each stage of study—eg       | 8   |
| 46 |                |                      | numbers potentially eligible, examined for eligibility,       |     |
| 47 |                |                      | confirmed eligible, included in the study, completing follow- |     |
| 48 |                |                      | up, and analysed. Give information separately for for         |     |
| 49 |                |                      | exposed and unexposed groups if applicable.                   |     |
| 50 |                |                      |                                                               |     |
| 51 |                |                      |                                                               |     |
| 52 |                |                      |                                                               |     |
| 53 |                |                      |                                                               |     |
| 54 |                |                      |                                                               |     |
| 55 |                |                      |                                                               |     |
| 56 |                |                      |                                                               |     |
| 57 | Participants   | <a href="#">#13b</a> | Give reasons for non-participation at each stage              | n/a |
| 58 |                |                      |                                                               |     |
| 59 |                |                      |                                                               |     |
| 60 |                |                      |                                                               |     |

|    |                   |                      |                                                                   |     |
|----|-------------------|----------------------|-------------------------------------------------------------------|-----|
| 1  | Participants      | <a href="#">#13c</a> | Consider use of a flow diagram                                    | n/a |
| 2  |                   |                      |                                                                   |     |
| 3  |                   |                      |                                                                   |     |
| 4  | Descriptive data  | <a href="#">#14a</a> | Give characteristics of study participants (eg demographic,       | 8   |
| 5  |                   |                      | clinical, social) and information on exposures and potential      |     |
| 6  |                   |                      | confounders. Give information separately for exposed and          |     |
| 7  |                   |                      | unexposed groups if applicable.                                   |     |
| 8  |                   |                      |                                                                   |     |
| 9  |                   |                      |                                                                   |     |
| 10 |                   |                      |                                                                   |     |
| 11 |                   |                      |                                                                   |     |
| 12 |                   |                      |                                                                   |     |
| 13 |                   |                      |                                                                   |     |
| 14 | Descriptive data  | <a href="#">#14b</a> | Indicate number of participants with missing data for each        | 8-9 |
| 15 |                   |                      | variable of interest                                              |     |
| 16 |                   |                      |                                                                   |     |
| 17 |                   |                      |                                                                   |     |
| 18 |                   |                      |                                                                   |     |
| 19 | Outcome data      | <a href="#">#15</a>  | Report numbers of outcome events or summary measures.             | 9   |
| 20 |                   |                      | Give information separately for exposed and unexposed             |     |
| 21 |                   |                      | groups if applicable.                                             |     |
| 22 |                   |                      |                                                                   |     |
| 23 |                   |                      |                                                                   |     |
| 24 |                   |                      |                                                                   |     |
| 25 |                   |                      |                                                                   |     |
| 26 |                   |                      |                                                                   |     |
| 27 | Main results      | <a href="#">#16a</a> | Give unadjusted estimates and, if applicable, confounder-         | 9   |
| 28 |                   |                      | adjusted estimates and their precision (eg, 95% confidence        |     |
| 29 |                   |                      | interval). Make clear which confounders were adjusted for         |     |
| 30 |                   |                      | and why they were included                                        |     |
| 31 |                   |                      |                                                                   |     |
| 32 |                   |                      |                                                                   |     |
| 33 |                   |                      |                                                                   |     |
| 34 |                   |                      |                                                                   |     |
| 35 |                   |                      |                                                                   |     |
| 36 |                   |                      |                                                                   |     |
| 37 | Main results      | <a href="#">#16b</a> | Report category boundaries when continuous variables were         | 9   |
| 38 |                   |                      | categorized                                                       |     |
| 39 |                   |                      |                                                                   |     |
| 40 |                   |                      |                                                                   |     |
| 41 |                   |                      |                                                                   |     |
| 42 | Main results      | <a href="#">#16c</a> | If relevant, consider translating estimates of relative risk into | n/a |
| 43 |                   |                      | absolute risk for a meaningful time period                        |     |
| 44 |                   |                      |                                                                   |     |
| 45 |                   |                      |                                                                   |     |
| 46 |                   |                      |                                                                   |     |
| 47 |                   |                      |                                                                   |     |
| 48 | Other analyses    | <a href="#">#17</a>  | Report other analyses done—e.g., analyses of subgroups            | N/A |
| 49 |                   |                      | and interactions, and sensitivity analyses                        |     |
| 50 |                   |                      |                                                                   |     |
| 51 |                   |                      |                                                                   |     |
| 52 |                   |                      |                                                                   |     |
| 53 | <b>Discussion</b> |                      |                                                                   |     |
| 54 |                   |                      |                                                                   |     |
| 55 |                   |                      |                                                                   |     |
| 56 | Key results       | <a href="#">#18</a>  | Summarise key results with reference to study objectives          | 11  |
| 57 |                   |                      |                                                                   |     |
| 58 |                   |                      |                                                                   |     |
| 59 |                   |                      |                                                                   |     |
| 60 |                   |                      |                                                                   |     |

|    |                          |                     |                                                                |       |
|----|--------------------------|---------------------|----------------------------------------------------------------|-------|
| 1  | Limitations              | <a href="#">#19</a> | Discuss limitations of the study, taking into account sources  | 13    |
| 2  |                          |                     | of potential bias or imprecision. Discuss both direction and   |       |
| 3  |                          |                     | magnitude of any potential bias.                               |       |
| 4  |                          |                     |                                                                |       |
| 5  |                          |                     |                                                                |       |
| 6  |                          |                     |                                                                |       |
| 7  |                          |                     |                                                                |       |
| 8  |                          |                     |                                                                |       |
| 9  | Interpretation           | <a href="#">#20</a> | Give a cautious overall interpretation considering objectives, | 11-12 |
| 10 |                          |                     | limitations, multiplicity of analyses, results from similar    |       |
| 11 |                          |                     | studies, and other relevant evidence.                          |       |
| 12 |                          |                     |                                                                |       |
| 13 |                          |                     |                                                                |       |
| 14 |                          |                     |                                                                |       |
| 15 |                          |                     |                                                                |       |
| 16 | Generalisability         | <a href="#">#21</a> | Discuss the generalisability (external validity) of the study  | 11-12 |
| 17 |                          |                     | results.                                                       |       |
| 18 |                          |                     |                                                                |       |
| 19 |                          |                     |                                                                |       |
| 20 |                          |                     |                                                                |       |
| 21 |                          |                     |                                                                |       |
| 22 | <b>Other Information</b> |                     |                                                                |       |
| 23 |                          |                     |                                                                |       |
| 24 |                          |                     |                                                                |       |
| 25 | Funding                  | <a href="#">#22</a> | Give the source of funding and the role of the funders for the | 15    |
| 26 |                          |                     | present study and, if applicable, for the original study on    |       |
| 27 |                          |                     | which the present article is based                             |       |
| 28 |                          |                     |                                                                |       |
| 29 |                          |                     |                                                                |       |
| 30 |                          |                     |                                                                |       |
| 31 |                          |                     |                                                                |       |
| 32 |                          |                     |                                                                |       |

33 None The STROBE checklist is distributed under the terms of the Creative Commons Attribution  
34 License CC-BY. This checklist can be completed online using <https://www.goodreports.org/>, a tool  
35 made by the [EQUATOR Network](#) in collaboration with [Penelope.ai](#)  
36  
37  
38  
39  
40  
41  
42  
43  
44  
45  
46  
47  
48  
49  
50  
51  
52  
53  
54  
55  
56  
57  
58  
59  
60
