# Supplementary material for: Antithrombotic management of patients with acute coronary syndrome and atrial fibrillation undergoing coronary stenting: a prospective, observational, nationwide study
Source: PubMed Central journal article supplement — BMJ Open. 2020 Dec 22;10(12):e041044. doi: 10.1136/bmjopen-2020-041044 (PMC7757435; doi:10.1136/bmjopen-2020-041044), 2020-12-22
Supplement: bmjopen-2020-041044supp001.pdf [file bmjopen-2020-041044supp001.pdf]

## APPENDIX

### Steering Committee

L De Luca (Chairman), A Di Lenarda (co-chairman), MM Gulizia (co-chairman), A Rubboli (co-chairman), L Bolognese, D Gabrielli, A Murrone, F Scotto Di Uccio, S Urbinati

### Coordinating Center

ANMCO Research Center (AP Maggioni, A Lorimer, D Lucci, L Cipressa, G Orsini, L Gonzini)

### Participating Centers and Investigators

Tivoli (A Granatelli, A Posteraro, AM Conti); Orbassano (F Ferrari, M Bianco, MG Perrelli); Reggio Calabria Grande Osp. Metropol. (F Lucà, F Ciancia, S Lanteri); Bari Osp. S. Paolo (P Caldarola, N Locuratolo, D Rutigliano); Caserta AO S. Anna e S. Sebastiano (A Vetrano, A Fusco); Lecce Osp. Vito Fazzi (M Callerame, T Mazzella); Conegliano (L Rivetti, M Centa); Reggio Emilia AUSL RE (A Navazio, M Ferri) Legnano (F Poletti, M Mariani); Pavia Policlinico S. Matteo (S Leonardi, F Fortuni); Palermo PO Cervello (A Ledda, G Geraci) Milano Osp. S. Luca - Istituto Auxologico (S Blengino, V Vaccaro); Milano Centro Cardiologico Monzino (J Campodonico, N Cosentino); Rivoli (I Meynet, MF Lococo); Torino Osp. S. Giovanni Bosco (S Brach Prever, E Petitti); Udine POU S. M. della Misericordia (S Poli, C Lutman); Pesaro (S Maffei, L Scappini); Potenza AO San Carlo (CP La Creta, G Paternò); Roma Osp. S. Spirito (E Olivieri, A Chiera); Catania AO Cannizzaro (F Amico, S Giubilato); Ragusa (A Nicosia, E Puzzangara); Savona (M Botta, M Ghione); Genova EO Ospedali Galliera (P Bernabò); Peschiera del Garda Casa di Cura Dr. Pederzoli (A Vicentini, O Spadaro); Rovereto (F Imperadore, G Musuraca); S. M. Capua Vetere (P Iodice, B Bosco); Terni AO S. Maria (P Mezzetti, M De Paolis); Avezzano (L Paraggio, M Santoro); Benevento (M Scherillo, D Formigli); Cefalù Fondazione G. Giglio (P Bonaccorso, M Giovino); Forlì (L Caravita, E Conficoni); Lido di Camaiore (G Casolo, A Lilli); Tricase (M Accogli, S Longo); Napoli Osp. del Mare (B Tuccillo, L Irace); Rho (G De Angelis, S Benincasa); Sassuolo (M Scapinelli, M Camellini); Bari Policlinico (M Pepe, D Zanna); Foggia Osp. Riuniti (ND Brunetti, A Ruggiero); Milano PO San Carlo (A Mafri, EMP Madonini); Roma Policlinico Umberto I (R Quaglione, FG Biccirè); Torino Osp. Maria Vittoria (M Giammaria, L Coda); Treviglio (PC Sganzerla, A Cardile); Aversa (L Fattore); Belluno (L Mario); Cagliari AO Brotzu (M Porcu); Gravedona (G Giacomarra); Imola (M Li Calzi); San Donà di Piave (C Canali); Andria (M Cannone); Avellino AORN S. Giuseppe Moscati (E Di Lorenzo); Bologna Osp. Maggiore (A Pecoraro); Desio (N Mollichelli); Eboli (G Bottiglieri); Foligno (M Scarpignato); Magenta (A Martinoni); Merate (S Maggiolini); Milano PO San Paolo (C Sponzilli); Napoli AORN Cardarelli (C Mauro); Roma Osp. S. Camillo (RL Putini); Roma Osp. Sant'Andrea (C Autore); San Severo (A Villella); Varese Osp. di Circolo e Fond. Macchi (A Limido); Brindisi (G Ignone); Castel Volturno (L Argenziano); Milano Osp. Metropolitan Niguarda (F Oliva); Nola (L Caliendo); Pistoia (M Comeglio); Pordenone (E Loiudice); Trento Osp. S. Chiara (R Bonmassari); Viterbo (L Sommariva); Bari Osp. di Venere (M Turturo); Firenze Osp. S. Giovanni di Dio (L Nicolaci); Mirano (S Saccà); Nuoro (G Casu); Pescia (P Giordano); Roma PO S. Filippo Neri (F Colivicchi).

**TABLE 1 SUPPL.** Independent predictors of TAT prescription at discharge.

| <b>Variable</b>            | <b>Odds Ratio</b> | <b>95% Confidence Intervals</b> | <b>P value</b> |
|----------------------------|-------------------|---------------------------------|----------------|
| Age 65-74 vs <65 years     | 2.87              | 1.69-4.87                       | 0.0003         |
| Age $\geq$ 75 vs <65 years | 2.32              | 1.40-3.82                       | 0.0003         |
| New onset AF               | 0.42              | 0.29-0.63                       | <0.0001        |
| Malignancy                 | 0.31              | 0.12-0.81                       | 0.002          |
| Bleeding events            | 0.21              | 0.10-0.43                       | <0.0001        |
